# Supplementary material for: Overcoming resistance to anabolic SARM therapy in experimental cancer cachexia with an HDAC inhibitor
Source: PubMed Central journal article supplement (PMC7005646; doi:10.15252/emmm.201809910), 2020-01-13

## **Appendix for:**

# **Overcoming Resistance to Anabolic SARM Therapy in Experimental Cancer Cachexia with an HDAC Inhibitor**

Sophia G. Liva<sup>1,\*</sup>, Yu-Chou Tseng<sup>2,\*</sup>, Anees M. Dauki<sup>1</sup>, Michael G. Sovic<sup>1</sup>, Trang Vu<sup>1</sup>, Sally E. Henderson<sup>3</sup>, Yi-Chiu Kuo<sup>2</sup>, Jason A. Benedict<sup>4</sup>, Xiaoli Zhang<sup>4</sup>, Bryan C. Remaily<sup>1</sup>, Samuel K. Kulp<sup>1</sup>, Moray Campbell<sup>1</sup>, Tanios Bekaii-Saab<sup>5</sup>, Mitchell A. Phelps<sup>1</sup>, Ching-Shih Chen<sup>2,6</sup> and Christopher C. Coss<sup>1</sup>

<sup>1</sup> Division of Pharmaceutics and Pharmaceutical Chemistry, College of Pharmacy, The Ohio State University, Columbus, OH

<sup>2</sup> Division of Medicinal Chemistry and Pharmacognosy, College of Pharmacy, The Ohio State University, Columbus, OH

<sup>3</sup> Department of Veterinary Biosciences, College of Veterinary Medicine, Ohio State University, Columbus OH

<sup>4</sup> Center for Biostatistics, Department of Biomedical Informatics, The Ohio State University, Columbus, OH

<sup>5</sup> Mayo Clinic Cancer Center, Phoenix, AZ

<sup>6</sup> Department of Medical Research, China Medical University Hospital, China Medical University, Taichung 40447, Taiwan

\*Equally contributing authors

### Corresponding Author:

Christopher C. Coss, PhD

Mailing Address: The Ohio State University College of Pharmacy, 500 W.12<sup>th</sup> Ave, Columbus OH, 43210

Phone: 614-688-1309

Fax: (614) 292-7766

E-mail: coss.16@osu.edu

**Running title:** SARM plus HDAC inhibitor for cancer cachexia

# Table of Contents

|                                                                                      |          |
|--------------------------------------------------------------------------------------|----------|
| Appendix Figure S1. ....                                                             | 4        |
| Appendix Figure S2. ....                                                             | 4        |
| Appendix Figure S3. ....                                                             | 4        |
| Appendix Figure S4. ....                                                             | 4        |
| Appendix Figure S5. ....                                                             | 5        |
| Appendix Figure S6. ....                                                             | 5        |
| Appendix Figure S7. ....                                                             | 5        |
| Appendix Figure S8. ....                                                             | 5        |
| Appendix Figure S9. ....                                                             | 5        |
| Appendix Figure S10. ....                                                            | 5        |
| Appendix Figure S11. ....                                                            | 6        |
| Appendix Figure S12. ....                                                            | 6        |
| Appendix Figure S13. ....                                                            | 6        |
| Appendix Figure S14. ....                                                            | 6        |
| Appendix Figure S15. ....                                                            | 6        |
| <b>Appendix Tables</b> .....                                                         | <b>7</b> |
| Appendix Table S1A-D (related to Figure 1) .....                                     | 7        |
| Appendix Table S2A-D (related to Figure 2) .....                                     | 8        |
| Appendix Table S3A-D (related to Figure 3) .....                                     | 9        |
| Appendix Table S4A-D (related to Figure 4) .....                                     | 10       |
| Appendix Table S5A-B (related to Figure 5).....                                      | 11       |
| Appendix Table 6A-B (related to Figure 6) .....                                      | 12       |
| Appendix Table 7 (related to Figure 7).....                                          | 13       |
| Appendix Table 8 (related to Figure 8).....                                          | 14       |
| Appendix Table 9 (related to Figure EV1).....                                        | 15       |
| Appendix Table 10 (related to Figure EV2).....                                       | 16       |
| Appendix Table 11 (related to Figure EV3).....                                       | 17       |
| Appendix Table 12 (related to Figure EV4).....                                       | 18       |
| Appendix Table S13. Serum Cytokine Panel – Complete Results. ....                    | 19       |
| Appendix Table S14. Primer sequences. ....                                           | 21       |
| Appendix Table S15. Post-alignment quality control metrics for RNA-seq dataset. .... | 22       |

**Appendix References.....23**

## Appendix Figures

### Appendix Figure S1.

**A)** Non-compartmental analysis of single dose AR-42 pharmacokinetics in mouse. Parameters were derived as outlined in the *Materials and Methods* section. **B)** AR-42 dose-response. Starting six days after C-26 cell injection, animals received vehicle or AR-42 orally at 1 (n=8), 3 (n=8), 10 (n=13) or 20 mg/kg (n=6) daily or 50 mg/kg (n=5) every other day for 13 days. Individual animal gastrocnemius weights are presented as a percentage of tumor-free control muscle weight. Dashed reference line (100%) represents the mean tumor-free gastrocnemius mass, solid line represents non-linear fit of dose-response data. **C)** AR-42's *in vitro* human HDAC isoform inhibition profile. HDAC activity of recombinant human HDAC enzymes was determined in the presence of 1  $\mu$ M AR-42 as outlined in the *Materials and Methods*.

### Appendix Figure S2.

Study 1 (male; n=20) and Study 3 (female; n=43) C-26 tumor volumes. Terminal tumor volume comparisons between Study 1 and Study 3. *Statistics*: ns, no significant between-study differences in tumor volumes. Student's t-test of combined tumor volumes (Study 1 versus Study 3). ns, no significant differences among treatment groups within each study, one-way ANOVA followed by Tukey's multiple comparison test. Individual p-values displayed in tables.

### Appendix Figure S3.

Study 4, tumor-bearing male mice receiving AR-42 (10 mg/kg, oral gavage; n=9), TFM-4AS-1 (10 mg/kg, subcutaneous; n=10), Combination of AR-42 and DHT (10 mg/kg oral gavage and 3 mg/kg subcutaneous, respectively; n=10), Combination of AR-42 and TFM-4AS-1 (10 mg/kg, both, n=9) or Vehicle (n=6) and tumor-free mice receiving vehicle (n=6) were treated daily for 12 days starting 6 days post-injection of C-26 cells. **A)** Tumor volume comparisons between Day 8 and Day 16 post-C-26 cell injection. *Statistics*: Individual p-values displayed in tables; ns, no significant differences; one-way ANOVA followed by Tukey's multiple comparison test. **B)** Androgen receptor western blot of C-26 and LLC tumor tissue and associated source cells. Mouse prostate tissue was analyzed as a positive control. **C)** C-26 cell viability was determined after 48 hours of treatment with DHT or GTx-024 at concentrations of up to 10  $\mu$ M. Data in panels A and C are presented as means  $\pm$  SD.

### Appendix Figure S4.

Study 4, Terminal epididymal fat pad mass from mice in Study 4 treated as described in Appendix Figure S7. *Statistics*: V, T, A indicate statistically significant differences versus tumor-bearing vehicle-treated, tumor-bearing TFM-4AS-1-treated and tumor-bearing AR-42-treated groups, respectively. Individual p-values displayed in tables, one-way ANOVA followed by Tukey's multiple comparison test. Data are presented as means  $\pm$  SD.

**Appendix Figure S5.**

Western blot analysis of AR in gastrocnemius muscles from representative mice in Study 1. Black circle – tumor-free, blue square – tumor-free/GTx-024, black triangle – tumor-bearing, blue diamond – tumor/GTx-024, red triangle – tumor/AR-42, green circle – tumor/combo.

**Appendix Figure S6.**

**A)** Genes differentially regulated in gastrocnemius muscle by 50 mg/kg AR-42 treatment relative to C-26 tumor-bearing vehicle-treated controls from Tseng *et al.* intersected with genes differentially regulated in quadriceps muscle from both severe and moderately wasting C-26 tumor-bearing mice relative to tumor-free controls from Bonetto *et al.* **B)** Canonical pathway analysis using GSEA of the 147 overlapping genes from **A**.

**Appendix Figure S7.**

Western blot analysis of phospho(p)STAT3 in gastrocnemius muscles from representative mice treated in Study 1. This data is a replicate blot generated from the samples used in Figure 6B. tSTAT3, total STAT3.

**Appendix Figure S8.**

Principle Component Analysis plots of Study 1 RNA-seq samples utilized for subsequent analyses.

**Appendix Figure S9.**

Standard volcano plots from RNA-seq analyses of Study 1 gastrocnemius muscles showing **A)** DEGs for tumor-bearing (cachectic) GTx-024-treated (Cx+GTx-024) mice versus tumor-free controls (colored red), and **B)** DEGs for tumor-bearing AR-42-treated (Cx+AR-42) mice versus tumor-free controls (colored red). Log<sub>2</sub>-transformed fold change (FC) in expression is plotted on the x-axis and -log<sub>10</sub> transformed Benjamini-Hochburg adjusted p-values are plotted on the y-axis.

**Appendix Figure S10.**

Enrichment plots of the STAT3 gene set for each treatment group versus tumor-bearing control comparisons. Tumor-free control (black checkered), GTx-024-treated tumor-free (blue checkered), GTx-024-treated tumor-bearing (blue), AR-42-treated tumor-bearing (red) and Combination-treated tumor-bearing (green).

### **Appendix Figure S11.**

Enrichment plots of the ATF-1 gene set for each treatment group versus tumor-bearing control comparisons. Tumor-free control (black checkered), GTx-024-treated tumor-free (blue checkered), GTx-024-treated tumor-bearing (blue), AR-42-treated tumor-bearing (red) and Combination-treated tumor-bearing (green).

### **Appendix Figure S12.**

**A)** Genes differentially regulated 4-fold or greater in gastrocnemius muscle by 50 mg/kg AR-42 treatment relative to tumor-bearing vehicle-treated controls from Tseng *et al.* intersected with genes differentially regulated 2-fold or greater in gastrocnemius muscle by 10 mg/kg AR-42 treatment relative to tumor-bearing controls from Study 1. **B)** Scatter plot of the 209 overlapping genes identified in **(A)**. **C)** Canonical pathway analysis using the 147 overlapping genes identified in **(A)**.

### **Appendix Figure S13.**

Standard volcano plot from RNA-seq analyses of Study 1 gastrocnemius muscles showing DEGs for GTx-024-treated tumor-free controls versus vehicle-treated tumor-free controls (colored red). Log<sub>2</sub>-transformed fold change (FC) in expression is plotted on the x-axis and -log<sub>10</sub> transformed Benjamini-Hochburg adjusted p-values are plotted on the y-axis.

### **Appendix Figure S14.**

Overlapping genes among leading-edge subsets from the enrichment analysis of the *Cttnb1* gene set presented in Figure 8 were identified. The comparisons performed were among GTx-024-treated tumor-free mice (GTx-024, Tumor Free; GTx), tumor-bearing mice (Cachexia; Cx) and **A)** GTx-024-treated tumor-bearing mice (GTx-024, Tumor Bearing; GTB), **B)** AR-42-treated tumor-bearing mice (AR-42, Tumor bearing; ATB), **C)** Combination-treated tumor-bearing mice (Combo, Tumor Bearing; CTB). In each case, the directionality of regulation compared to tumor-free controls is designated by arrows.

### **Appendix Figure S15.**

Heat map of DEGs within the *Cttnb1* gene set (mean z score). Tumor-free control (black checkered), GTx-024-treated tumor-free (blue checkered), tumor-bearing control (black), GTx-024-treated tumor-bearing (blue), AR-42-treated tumor-bearing (red) and Combination-treated tumor-bearing (green).

## Appendix Tables

**Appendix Table S1A-D (related to Figure 1): p-values from statistical comparisons.** One way ANOVA followed by Tukey's multiple comparison test.

### A. Terminal Body Weight (Figure 1C)

| p-values      |             | Tumor Free |         | Tumor Bearing |             |           |         |
|---------------|-------------|------------|---------|---------------|-------------|-----------|---------|
|               |             | Veh        | GTx-024 | Veh (V)       | GTx-024 (G) | AR-42 (A) | Combo   |
| Tumor Free    | Veh         |            | 0.9523  | 0.0022        | 0.0006      | 0.3525    | >0.9999 |
|               | GTx-024     | 0.9523     |         | 0.0003        | <0.0001     | 0.08      | 0.957   |
| Tumor Bearing | Veh (V)     | 0.0022     | 0.0003  |               | 0.997       | 0.2572    | 0.0037  |
|               | GTx-024 (G) | 0.0006     | <0.0001 | 0.997         |             | 0.1096    | 0.0011  |
|               | AR-42 (A)   | 0.3525     | 0.08    | 0.2572        | 0.1096      |           | 0.4089  |
|               | Combo       | >0.9999    | 0.957   | 0.0037        | 0.0011      | 0.4089    |         |

### B. Tumor Volume (Figure 1D)

| p-values      |             | Tumor Bearing |             |           |        |
|---------------|-------------|---------------|-------------|-----------|--------|
|               |             | Veh (V)       | GTx-024 (G) | AR-42 (A) | Combo  |
| Tumor Bearing | Veh (V)     |               | 0.9167      | 0.94      | 0.7914 |
|               | GTx-024 (G) | 0.9167        |             | 0.9998    | 0.9917 |
|               | AR-42 (A)   | 0.94          | 0.9998      |           | 0.9837 |
|               | Combo       | 0.7914        | 0.9917      | 0.9837    |        |

### C. Gastroc Mass (Figure 1E)

| p-values      |             | Tumor Free |         | Tumor Bearing |             |           |        |
|---------------|-------------|------------|---------|---------------|-------------|-----------|--------|
|               |             | Veh        | GTx-024 | Veh (V)       | GTx-024 (G) | AR-42 (A) | Combo  |
| Tumor Free    | Veh         |            | 0.5108  | 0.0872        | 0.0499      | 0.8541    | 0.9966 |
|               | GTx-024     | 0.5108     |         | 0.0016        | 0.0008      | 0.0846    | 0.8341 |
| Tumor Bearing | Veh (V)     | 0.0872     | 0.0016  |               | 0.9998      | 0.6137    | 0.0424 |
|               | GTx-024 (G) | 0.0499     | 0.0008  | 0.9998        |             | 0.4605    | 0.024  |
|               | AR-42 (A)   | 0.8541     | 0.0846  | 0.6137        | 0.4605      |           | 0.6309 |
|               | Combo       | 0.9966     | 0.8341  | 0.0424        | 0.024       | 0.6309    |        |

### D. Quadriceps Mass (Figure 1F)

| p-values      |             | Tumor Free |         | Tumor Bearing |             |           |         |
|---------------|-------------|------------|---------|---------------|-------------|-----------|---------|
|               |             | Veh        | GTx-024 | Veh (V)       | GTx-024 (G) | AR-42 (A) | Combo   |
| Tumor Free    | Veh         |            | 0.3151  | 0.1604        | 0.0034      | 0.7106    | >0.9999 |
|               | GTx-024     | 0.3151     |         | 0.0015        | <0.0001     | 0.0219    | 0.3545  |
| Tumor Bearing | Veh (V)     | 0.1604     | 0.0015  |               | 0.5922      | 0.9042    | 0.2015  |
|               | GTx-024 (G) | 0.0034     | <0.0001 | 0.5922        |             | 0.1207    | 0.0056  |
|               | AR-42 (A)   | 0.7106     | 0.0219  | 0.9042        | 0.1207      |           | 0.7563  |
|               | Combo       | >0.9999    | 0.3545  | 0.2015        | 0.0056      | 0.7563    |         |

**Appendix Table S2A-D (related to Figure 2):** p-values from statistical comparisons. One way ANOVA followed by Tukey's multiple comparison test.

**A. Terminal Body Weight (Figure 2A)**

| p-values      |             | Tumor Free |         | Tumor Bearing |             |           |        |
|---------------|-------------|------------|---------|---------------|-------------|-----------|--------|
|               |             | Veh        | GTx-024 | Veh (V)       | GTx-024 (G) | AR-42 (A) | Combo  |
| Tumor Free    | Veh         |            | 0.9986  | <0.0001       | <0.0001     | <0.0001   | 0.0116 |
|               | GTx-024     | 0.9986     |         | <0.0001       | <0.0001     | <0.0001   | 0.0033 |
| Tumor Bearing | Veh (V)     | <0.0001    | <0.0001 |               | 0.9998      | 0.2062    | 0.0017 |
|               | GTx-024 (G) | <0.0001    | <0.0001 | 0.9998        |             | 0.0722    | 0.0002 |
|               | AR-42 (A)   | <0.0001    | <0.0001 | 0.2062        | 0.0722      |           | 0.3422 |
|               | Combo       | 0.0116     | 0.0033  | 0.0017        | 0.0002      | 0.3422    |        |

**B. Gastroc Mass (Figure 2B)**

| p-values      |             | Tumor Free |         | Tumor Bearing |             |           |         |
|---------------|-------------|------------|---------|---------------|-------------|-----------|---------|
|               |             | Veh        | GTx-024 | Veh (V)       | GTx-024 (G) | AR-42 (A) | Combo   |
| Tumor Free    | Veh         |            | 0.5864  | <0.0001       | <0.0001     | 0.0068    | 0.0158  |
|               | GTx-024     | 0.5864     |         | <0.0001       | <0.0001     | <0.0001   | <0.0001 |
| Tumor Bearing | Veh (V)     | <0.0001    | <0.0001 |               | 0.9871      | 0.0933    | 0.0442  |
|               | GTx-024 (G) | <0.0001    | <0.0001 | 0.9871        |             | 0.0085    | 0.0031  |
|               | AR-42 (A)   | 0.0068     | <0.0001 | 0.0933        | 0.0085      |           | 0.9993  |
|               | Combo       | 0.0158     | <0.0001 | 0.0442        | 0.0031      | 0.9993    |         |

**C. Quadriceps Mass (Figure 2C)**

| p-values      |             | Tumor Free |         | Tumor Bearing |             |           |        |
|---------------|-------------|------------|---------|---------------|-------------|-----------|--------|
|               |             | Veh        | GTx-024 | Veh (V)       | GTx-024 (G) | AR-42 (A) | Combo  |
| Tumor Free    | Veh         |            | 0.9961  | <0.0001       | <0.0001     | <0.0001   | 0.0009 |
|               | GTx-024     | 0.9961     |         | <0.0001       | <0.0001     | <0.0001   | 0.0002 |
| Tumor Bearing | Veh (V)     | <0.0001    | <0.0001 |               | 0.9977      | 0.1       | 0.0045 |
|               | GTx-024 (G) | <0.0001    | <0.0001 | 0.9977        |             | 0.0166    | 0.0003 |
|               | AR-42 (A)   | <0.0001    | <0.0001 | 0.1           | 0.0166      |           | 0.7894 |
|               | Combo       | 0.0009     | 0.0002  | 0.0045        | 0.0003      | 0.7894    |        |

**D. Grip Strength (Figure 2D)**

| p-values      |             | Tumor Free |         | Tumor Bearing |             |           |        |
|---------------|-------------|------------|---------|---------------|-------------|-----------|--------|
|               |             | Veh        | GTx-024 | Veh (V)       | GTx-024 (G) | AR-42 (A) | Combo  |
| Tumor Free    | Veh         |            | 0.2964  | 0.177         | 0.8912      | 0.9941    | 0.3545 |
|               | GTx-024     | 0.2964     |         | 0.0005        | 0.0158      | 0.4868    | 0.9996 |
| Tumor Bearing | Veh (V)     | 0.177      | 0.0005  |               | 0.6028      | 0.0278    | 0.0003 |
|               | GTx-024 (G) | 0.8912     | 0.0158  | 0.6028        |             | 0.4645    | 0.0133 |
|               | AR-42 (A)   | 0.9941     | 0.4868  | 0.0278        | 0.4645      |           | 0.5762 |
|               | Combo       | 0.3545     | 0.9996  | 0.0003        | 0.0133      | 0.5762    |        |



**Appendix Table S3A-D (related to Figure 3): p-values from statistical comparisons. One way ANOVA followed by Tukey's multiple comparison test.**

**A. Terminal Bodyweight (Figure 3A)**

| p-values      |             | Tumor Free | Tumor Bearing |             |           |        |
|---------------|-------------|------------|---------------|-------------|-----------|--------|
|               |             | Veh        | Veh (V)       | GTx-024 (G) | AR-42 (A) | Combo  |
| Tumor Free    | Veh         |            | 0.0224        | 0.653       | 0.3737    | 0.9461 |
| Tumor Bearing | Veh (V)     | 0.0224     |               | 0.2304      | 0.487     | 0.0002 |
|               | GTx-024 (G) | 0.653      | 0.2304        |             | 0.9846    | 0.0977 |
|               | AR-42 (A)   | 0.3737     | 0.487         | 0.9846      |           | 0.0233 |
|               | Combo       | 0.9461     | 0.0002        | 0.0977      | 0.0233    |        |

**B. Gastroc Mass (Figure 3B)**

| p-values      |             | Tumor Free | Tumor Bearing |             |           |         |
|---------------|-------------|------------|---------------|-------------|-----------|---------|
|               |             | Veh        | Veh (V)       | GTx-024 (G) | AR-42 (A) | Combo   |
| Tumor Free    | Veh         |            | 0.0066        | 0.6483      | 0.0772    | 0.827   |
| Tumor Bearing | Veh (V)     | 0.0066     |               | 0.0802      | 0.7778    | <0.0001 |
|               | GTx-024 (G) | 0.6483     | 0.0802        |             | 0.5639    | 0.039   |
|               | AR-42 (A)   | 0.0772     | 0.7778        | 0.5639      |           | 0.0004  |
|               | Combo       | 0.827      | <0.0001       | 0.039       | 0.0004    |         |

**C. Quadriceps Mass (Figure 3C)**

| p-values      |             | Tumor Free | Tumor Bearing |             |           |         |
|---------------|-------------|------------|---------------|-------------|-----------|---------|
|               |             | Veh        | Veh (V)       | GTx-024 (G) | AR-42 (A) | Combo   |
| Tumor Free    | Veh         |            | 0.0129        | 0.3377      | 0.2743    | 0.5912  |
| Tumor Bearing | Veh (V)     | 0.0129     |               | 0.388       | 0.5257    | <0.0001 |
|               | GTx-024 (G) | 0.3377     | 0.388         |             | 0.9997    | 0.0014  |
|               | AR-42 (A)   | 0.2743     | 0.5257        | 0.9997      |           | 0.001   |
|               | Combo       | 0.5912     | <0.0001       | 0.0014      | 0.001     |         |

**D. Grip Strength (Figure 3D)**

| p-values      |             | Tumor Free | Tumor Bearing |             |           |         |
|---------------|-------------|------------|---------------|-------------|-----------|---------|
|               |             | Veh        | Veh (V)       | GTx-024 (G) | AR-42 (A) | Combo   |
| Tumor Free    | Veh         |            | 0.0011        | 0.0137      | 0.484     | 0.991   |
| Tumor Bearing | Veh (V)     | 0.0011     |               | 0.8763      | 0.0248    | <0.0001 |
|               | GTx-024 (G) | 0.0137     | 0.8763        |             | 0.2391    | 0.0003  |
|               | AR-42 (A)   | 0.484      | 0.0248        | 0.2391      |           | 0.0952  |
|               | Combo       | 0.991      | <0.0001       | 0.0003      | 0.0952    |         |

**Appendix Table S4A-D (related to Figure 4): p-values from statistical comparisons.** One way ANOVA followed by Tukey's multiple comparison test.

**A. Terminal Bodyweight (Figure 4A)**

| p-values      |               | Tumor Free | Tumor Bearing |               |           |           |           |
|---------------|---------------|------------|---------------|---------------|-----------|-----------|-----------|
|               |               | Veh        | Veh (V)       | TFM-4AS-1 (T) | AR-42 (A) | TFM/AR-42 | DHT/AR-42 |
| Tumor Free    | Veh           |            | 0.0038        | 0.0479        | 0.068     | 0.7242    | >0.9999   |
| Tumor Bearing | Veh (V)       | 0.0038     |               | 0.8694        | 0.8391    | 0.0755    | 0.0004    |
|               | TFM-4AS-1 (T) | 0.0479     | 0.8694        |               | >0.9999   | 0.50858   | 0.0092    |
|               | AR-42 (A)     | 0.0681     | 0.8391        | >0.9999       |           | 0.598     | 0.0159    |
|               | TFM/AR-42     | 0.7242     | 0.0755        | 0.5085        | 0.598     |           | 0.4998    |
|               | DHT/AR-42     | >0.9999    | 0.0004        | 0.0092        | 0.0159    | 0.4998    |           |

**B. Gastroc Mass (Figure 4B)**

| p-values      |               | Tumor Free | Tumor Bearing |               |           |           |           |
|---------------|---------------|------------|---------------|---------------|-----------|-----------|-----------|
|               |               | Veh        | Veh (V)       | TFM-4AS-1 (T) | AR-42 (A) | TFM/AR-42 | DHT/AR-42 |
| Tumor Free    | Veh           |            | 0.0011        | 0.0031        | 0.0609    | 0.2755    | 0.7767    |
| Tumor Bearing | Veh (V)       | 0.0011     |               | 0.9966        | 0.6082    | 0.1752    | 0.0135    |
|               | TFM-4AS-1 (T) | 0.0031     | 0.9966        |               | 0.8566    | 0.3643    | 0.0387    |
|               | AR-42 (A)     | 0.0609     | 0.6082        | 0.8566        |           | 0.9634    | 0.4518    |
|               | TFM/AR-42     | 0.2755     | 0.1752        | 0.3643        | 0.9634    |           | 0.9147    |
|               | DHT/AR-42     | 0.7767     | 0.0135        | 0.0387        | 0.4518    | 0.9147    |           |

**C. Quadriceps Mass (Figure 4C)**

| p-values      |               | Tumor Free | Tumor Bearing |               |           |           |           |
|---------------|---------------|------------|---------------|---------------|-----------|-----------|-----------|
|               |               | Veh        | Veh (V)       | TFM-4AS-1 (T) | AR-42 (A) | TFM/AR-42 | DHT/AR-42 |
| Tumor Free    | Veh           |            | <0.0001       | <0.0001       | 0.0015    | 0.0115    | 0.0468    |
| Tumor Bearing | Veh (V)       | <0.0001    |               | 0.8818        | 0.424     | 0.1024    | 0.016     |
|               | TFM-4AS-1 (T) | <0.0001    | 0.8818        |               | 0.9582    | 0.5776    | 0.1848    |
|               | AR-42 (A)     | 0.0015     | 0.424         | 0.9582        |           | 0.9699    | 0.6819    |
|               | TFM/AR-42     | 0.0115     | 0.1024        | 0.5776        | 0.9699    |           | 0.9838    |
|               | DHT/AR-42     | 0.0468     | 0.016         | 0.1848        | 0.6819    | 0.9838    |           |

**D. Grip Strength (Figure 4D)**

| p-values      |               | Tumor Bearing |               |           |           |           |
|---------------|---------------|---------------|---------------|-----------|-----------|-----------|
|               |               | Veh (V)       | TFM-4AS-1 (T) | AR-42 (A) | TFM/AR-42 | DHT/AR-42 |
| Tumor Bearing | Veh (V)       |               | 0.9582        | 0.9663    | 0.0347    | 0.9999    |
|               | TFM-4AS-1 (T) | 0.9582        |               | 0.6617    | 0.0044    | 0.9104    |
|               | AR-42 (A)     | 0.9663        | 0.6617        |           | 0.1486    | 0.9854    |
|               | TFM/AR-42     | 0.0347        | 0.0044        | 0.1486    |           | 0.0412    |
|               | DHT/AR-42     | 0.9999        | 0.9104        | 0.9854    | 0.0412    |           |

**Appendix Table S5A-B (related to Figure 5): p-values from statistical comparisons.** One way ANOVA followed by Dunnett's multiple comparison test.

**A. Cachexia-associated markers (Figure 5A)**

| p-values (Atrogin-1) |         | Tumor Free |         | Tumor Bearing |             |           |         |
|----------------------|---------|------------|---------|---------------|-------------|-----------|---------|
|                      |         | Veh        | GTx-024 | Veh (V)       | GTx-024 (G) | AR-42 (A) | Combo   |
| Tumor Bearing        | Veh (V) | <0.0001    | <0.0001 |               | 0.4099      | 0.0003    | <0.0001 |

| p-values (MuRF-1) |         | Tumor Free |         | Tumor Bearing |             |           |         |
|-------------------|---------|------------|---------|---------------|-------------|-----------|---------|
|                   |         | Veh        | GTx-024 | Veh (V)       | GTx-024 (G) | AR-42 (A) | Combo   |
| Tumor Bearing     | Veh (V) | <0.0001    | <0.0001 |               | 0.4863      | <0.0001   | <0.0001 |

| p-values (CEPB $\delta$ ) |         | Tumor Free |         | Tumor Bearing |             |           |        |
|---------------------------|---------|------------|---------|---------------|-------------|-----------|--------|
|                           |         | Veh        | GTx-024 | Veh (V)       | GTx-024 (G) | AR-42 (A) | Combo  |
| Tumor Bearing             | Veh (V) | <0.0001    | <0.0001 |               | 0.9377      | 0.0478    | 0.0002 |

**B. Androgen receptor (Figure 5B)**

| p-values      |         | Tumor Free |         | Tumor Bearing |             |           |        |
|---------------|---------|------------|---------|---------------|-------------|-----------|--------|
|               |         | Veh        | GTx-024 | Veh (V)       | GTx-024 (G) | AR-42 (A) | Combo  |
| Tumor Bearing | Veh (V) | 0.5444     | 0.9984  |               | 0.5631      | 0.8676    | 0.3182 |

**Appendix Table S6A-B (related to Figure 6): p-values from statistical comparisons. One way ANOVA followed by Tukey's multiple comparison test.**

**A. Spleen Mass (Figure 6D)**

| p-values      |             | Tumor Free |         | Tumor Bearing |             |           |         |
|---------------|-------------|------------|---------|---------------|-------------|-----------|---------|
|               |             | Veh        | GTx-024 | Veh (V)       | GTx-024 (G) | AR-42 (A) | Combo   |
| Tumor Free    | Veh         |            | >0.9999 | 0.0003        | <0.0001     | <0.0001   | <0.0001 |
|               | GTx-024     | >0.9999    |         | 0.0006        | <0.0001     | <0.0001   | <0.0001 |
| Tumor Bearing | Veh (V)     | 0.0003     | 0.0006  |               | 0.972       | 0.0568    | 0.0489  |
|               | GTx-024 (G) | <0.0001    | <0.0001 | 0.972         |             | 0.1801    | 0.1574  |
|               | AR-42 (A)   | <0.0001    | <0.0001 | 0.0568        | 0.1801      |           | >0.9999 |
|               | Combo       | <0.0001    | <0.0001 | 0.0489        | 0.1574      | >0.9999   |         |

**B. C26 Tumor Tissue (Figure 6E)**

| p-values      |             | Tumor Bearing |             |           |        |
|---------------|-------------|---------------|-------------|-----------|--------|
|               |             | Veh (V)       | GTx-024 (G) | AR-42 (A) | Combo  |
| Tumor Bearing | Veh (V)     |               | 0.9806      | 0.5557    | 0.0003 |
|               | GTx-024 (G) | 0.9806        |             | 0.7425    | 0.0004 |
|               | AR-42 (A)   | 0.5557        | 0.7425      |           | 0.0078 |
|               | Combo       | 0.0003        | 0.0004      | 0.0078    |        |

**Appendix Table S7 (related to Figure 7G): p-values from statistical comparisons.** One way ANOVA followed by Tukey's multiple comparison test.

| p-values      |             | Tumor Free |         |         |
|---------------|-------------|------------|---------|---------|
|               |             | Veh        |         |         |
| Target:       |             | IL-6       | IL-6RA  | GP130   |
| Tumor Free    | Veh         |            |         |         |
|               | GTx-024 (G) | 0.9976     | 0.9976  | 0.9976  |
| Tumor Bearing | Veh (V)     | 0.789      | <0.0001 | <0.0001 |
|               | GTx-024 (G) | 0.1912     | <0.0001 | <0.0001 |
|               | AR-42 (A)   | >0.9999    | 0.2624  | 0.0665  |
|               | Combo       | >0.9999    | 0.6716  | 0.5507  |

**Appendix Table S8 (related to Figure 8E):** p-values from statistical comparisons. One way ANOVA followed by Tukey's multiple comparison test.

| p-values      |             | Tumor Free |        |        |        |         |
|---------------|-------------|------------|--------|--------|--------|---------|
|               |             | Veh        |        |        |        |         |
| Target:       |             | WNT5a      | FZD1   | GSK3B  | CTNNB1 | CCND1   |
| Tumor Free    | Veh         |            |        |        |        |         |
|               | GTx-024 (G) | 0.9976     | 0.9976 | 0.9976 | 0.9976 | 0.9976  |
| Tumor Bearing | Veh (V)     | <0.0001    | 0.0046 | 0.0069 | 0.0003 | <0.0001 |
|               | GTx-024 (G) | <0.0001    | 0.0261 | 0.0611 | 0.0046 | <0.0001 |
|               | AR-42 (A)   | 0.3528     | 0.9917 | 0.8191 | 0.0453 | 0.0025  |
|               | Combo       | 0.6638     | 0.9655 | 0.9812 | 0.4696 | 0.4108  |

**Appendix Table S9 (related to Figure EV1):** p-values from statistical comparisons. One way ANOVA followed by Tukey's multiple comparison test.

**A. Terminal Body Weight (Figure EV1A)**

| p-values |             | SHAM    | ORX     |             |
|----------|-------------|---------|---------|-------------|
|          |             | Veh     | Veh (V) | GTx-024 (G) |
| SHAM     | Veh         |         | <0.0001 | 0.4436      |
| ORX      | Veh (V)     | <0.0001 |         | <0.0001     |
|          | GTx-024 (G) | 0.4436  | <0.0001 |             |

**B. Gastrocnemius (Figure EV1B)**

| p-values |             | SHAM    | ORX     |             |
|----------|-------------|---------|---------|-------------|
|          |             | Veh     | Veh (V) | GTx-024 (G) |
| SHAM     | Veh         |         | <0.0001 | 0.0757      |
| ORX      | Veh (V)     | <0.0001 |         | <0.0001     |
|          | GTx-024 (G) | 0.0757  | <0.0001 |             |

**C. Quadriceps (Figure EV1C)**

| p-values |             | SHAM    | ORX     |             |
|----------|-------------|---------|---------|-------------|
|          |             | Veh     | Veh (V) | GTx-024 (G) |
| SHAM     | Veh         |         | <0.0001 | 0.9373      |
| ORX      | Veh (V)     | <0.0001 |         | <0.0001     |
|          | GTx-024 (G) | 0.9373  | <0.0001 |             |

**D. Grip Strength (Figure EV1D)**

| p-values |             | SHAM    | ORX     |             |
|----------|-------------|---------|---------|-------------|
|          |             | Veh     | Veh (V) | GTx-024 (G) |
| SHAM     | Veh         |         | 0.9608  | <0.0001     |
| ORX      | Veh (V)     | 0.9608  |         | <0.0001     |
|          | GTx-024 (G) | <0.0001 | <0.0001 |             |

**Appendix Table S10 (related to Figure EV2):** p-values from statistical comparisons. One way ANOVA followed by Tukey's multiple comparison test.

**A. Luteinizing Hormone (Figure EV2A)**

| p-values      |             | Tumor Free |         | Tumor Bearing |             |           |         |
|---------------|-------------|------------|---------|---------------|-------------|-----------|---------|
|               |             | Veh        | GTx-024 | Veh (V)       | GTx-024 (G) | AR-42 (A) | Combo   |
| Tumor Free    | Veh         |            | 0.1705  | >0.9999       | 0.4212      | 0.9984    | 0.3973  |
|               | GTx-024     | 0.1705     |         | 0.2411        | 0.9996      | 0.396     | 0.9984  |
| Tumor Bearing | Veh (V)     | >0.9999    | 0.2411  |               | 0.5074      | 0.9996    | 0.4909  |
|               | GTx-024 (G) | 0.4212     | 0.9996  | 0.5074        |             | 0.686     | >0.9999 |
|               | AR-42 (A)   | 0.9984     | 0.396   | 0.9996        | 0.686       |           | 0.6801  |
|               | Combo       | 0.3973     | 0.9984  | 0.4909        | >0.9999     | 0.6801    |         |

**B. Spleen Mass (Figure EV2C)**

| p-values      |             | Tumor Free |         | Tumor Bearing |             |           |         |
|---------------|-------------|------------|---------|---------------|-------------|-----------|---------|
|               |             | Veh        | GTx-024 | Veh (V)       | GTx-024 (G) | AR-42 (A) | Combo   |
| Tumor Free    | Veh         |            | 0.9998  | <0.0001       | <0.0001     | <0.0001   | <0.0001 |
|               | GTx-024     | 0.9998     |         | <0.0001       | <0.0001     | <0.0001   | <0.0001 |
| Tumor Bearing | Veh (V)     | <0.0001    | <0.0001 |               | 0.9503      | 0.3272    | 0.2985  |
|               | GTx-024 (G) | <0.0001    | <0.0001 | 0.9503        |             | 0.8273    | 0.7977  |
|               | AR-42 (A)   | <0.0001    | <0.0001 | 0.3272        | 0.8273      |           | >0.9999 |
|               | Combo       | <0.0001    | <0.0001 | 0.2985        | 0.7977      | >0.9999   |         |



**Appendix Table S11 (related to Figure EV3):** p-values from statistical comparisons. One way ANOVA followed by Tukey's multiple comparison test.

**A. Tumor Volume (Figure EV3A)**

| p-values (Study 1) |             | Tumor Bearing |             |           |         |
|--------------------|-------------|---------------|-------------|-----------|---------|
|                    |             | Veh (V)       | GTx-024 (G) | AR-42 (A) | Combo   |
| Tumor Bearing      | Veh (V)     |               | 0.9969      | 0.9984    | 0.9783  |
|                    | GTx-024 (G) | 0.9969        |             | >0.9999   | >0.9999 |
|                    | AR-42 (A)   | 0.9984        | >0.9999     |           | 0.9999  |
|                    | Combo       | 0.9783        | >0.9999     | 0.9999    |         |

| p-values (Study 2) |             | Tumor Bearing |             |           |        |
|--------------------|-------------|---------------|-------------|-----------|--------|
|                    |             | Veh (V)       | GTx-024 (G) | AR-42 (A) | Combo  |
| Tumor Bearing      | Veh (V)     |               | 0.4489      | 0.5526    | 0.1588 |
|                    | GTx-024 (G) | 0.4489        |             | >0.9999   | 0.9876 |
|                    | AR-42 (A)   | 0.5526        | >0.9999     |           | 0.9744 |
|                    | Combo       | 0.1588        | 0.9876      | 0.9744    |        |

**B. Adipose Mass (Figure EV3B)**

| p-values      |             | Tumor Free |         | Tumor Bearing |             |           |         |
|---------------|-------------|------------|---------|---------------|-------------|-----------|---------|
|               |             | Veh        | GTx-024 | Veh (V)       | GTx-024 (G) | AR-42 (A) | Combo   |
| Tumor Free    | Veh         |            | 0.8353  | <0.0001       | <0.0001     | <0.0001   | <0.0001 |
|               | GTx-024     | 0.8353     |         | <0.0001       | <0.0001     | <0.0001   | <0.0001 |
| Tumor Bearing | Veh (V)     | <0.0001    | <0.0001 |               | 0.7624      | 0.9804    | 0.3481  |
|               | GTx-024 (G) | <0.0001    | <0.0001 | 0.7624        |             | 0.2566    | 0.0089  |
|               | AR-42 (A)   | <0.0001    | <0.0001 | 0.9804        | 0.2566      |           | 0.7217  |
|               | Combo       | <0.0001    | <0.0001 | 0.3481        | 0.0089      | 0.7217    |         |

**Appendix Table S12 (related to Figure EV4):** p-values from statistical comparisons. One way ANOVA followed by Tukey's multiple comparison test.

**A. Tumor Mass (Figure EV4C)**

| p-values      |             | Tumor Bearing |             |           |         |
|---------------|-------------|---------------|-------------|-----------|---------|
|               |             | Veh (V)       | GTx-024 (G) | AR-42 (A) | Combo   |
| Tumor Bearing | Veh (V)     |               | >0.9999     | 0.8187    | >0.9999 |
|               | GTx-024 (G) | >0.9999       |             | 0.794     | >0.9999 |
|               | AR-42 (A)   | 0.8187        | 0.794       |           | 0.8326  |
|               | Combo       | >0.9999       | >0.9999     | 0.8326    |         |

**B. Terminal Bodyweight (Figure EV4D)**

| p-values      |             | Tumor Free | Tumor Bearing |             |           |        |
|---------------|-------------|------------|---------------|-------------|-----------|--------|
|               |             | Veh        | Veh (V)       | GTx-024 (G) | AR-42 (A) | Combo  |
| Tumor         | Veh         |            | 0.0294        | 0.0327      | 0.0015    | 0.1071 |
| Tumor Bearing | Veh (V)     | 0.0294     |               | >0.9999     | 0.7595    | 0.9766 |
|               | GTx-024 (G) | 0.0327     | >0.9999       |             | 0.6801    | 0.9875 |
|               | AR-42 (A)   | 0.0015     | 0.7595        | 0.6801      |           | 0.4126 |
|               | Combo       | 0.1071     | 0.9766        | 0.9875      | 0.4126    |        |

**C. Gastroc Mass (Figure EV4E)**

| p-values      |             | Tumor Free | Tumor Bearing |             |           |         |
|---------------|-------------|------------|---------------|-------------|-----------|---------|
|               |             | Veh        | Veh (V)       | GTx-024 (G) | AR-42 (A) | Combo   |
| Tumor         | Veh         |            | <0.0001       | <0.0001     | <0.0001   | <0.0001 |
| Tumor Bearing | Veh (V)     | <0.0001    |               | 0.987       | 0.9894    | 0.9999  |
|               | GTx-024 (G) | <0.0001    | 0.987         |             | >0.9999   | 0.9686  |
|               | AR-42 (A)   | <0.0001    | 0.9894        | >0.9999     |           | 0.973   |
|               | Combo       | <0.0001    | 0.9999        | 0.9686      | 0.973     |         |

**Appendix Table S13. Serum Cytokine Panel – Complete Results.** Multiplex analysis of diverse serum cytokines<sup>a</sup> at Day 17 sacrifice from Study 2.<sup>b</sup>

|             | Tumor-free           |                      | C-26 Tumor-bearing     |                       |                      |                       |
|-------------|----------------------|----------------------|------------------------|-----------------------|----------------------|-----------------------|
|             | Vehicle              | GTx-024              | Vehicle                | GTx-024               | AR-42                | Combo                 |
| Eotaxin     | 715.35 ±<br>120.63   | 669.53 ±<br>100.70   | 846.40 ±<br>222.70     | 876.82 ±<br>100.53    | 735.73 ±<br>110.62   | 754.99 ±<br>93.28     |
| G-CSF       | 248.66 ±<br>64.60*   | 338.39 ±<br>71.70*   | 12164.11 ±<br>18944.48 | 2446.63 ±<br>1625.70* | 2782.18 ±<br>2191.30 | 1674.20 ±<br>1160.74* |
| GM-CSF      | 18.71 ± 5.56         | 13.27 ± 4.62*        | 21.92 ± 5.36           | 17.35 ± 4.33          | 18.70 ± 3.77         | 20.58 ± 5.40          |
| IFNg        | 7.19 ± 2.69          | 5.93 ± 2.14          | 4.44 ± 2.58            | 4.12 ± 2.09           | 4.69 ± 1.11          | 3.31 ± 1.85           |
| IL-1a       | 228.75 ±<br>279.11   | 60.41 ±<br>56.12     | 82.77 ±<br>61.73       | 167.80 ±<br>156.50    | 143.31 ±<br>157.59   | 58.77 ±<br>40.43      |
| IL-1b       | 11.26 ± 9.64         | 14.65 ± 5.66         | 15.22 ± 8.72           | 12.12 ± 5.54          | 20.48 ± 6.25         | 10.31 ± 6.93          |
| IL-2        | 18.51 ± 11.07        | 15.43 ± 6.56         | 20.81 ± 14.87          | 15.62 ± 3.41          | 19.37 ± 6.07         | 13.74 ± 4.30          |
| IL-3        | 1.73 ± 0.77          | 1.10 ± 0.63          | 10.24 ± 24.68          | 0.92 ± 0.56           | 0.72 ± 0.83          | 0.85 ± 0.44           |
| IL-4        | 0.98 ± 0.94          | 0.48 ± 0.37          | 0.35 ± 0.21            | 0.23 ± 0.14           | 0.32 ± 0.19          | 0.27 ± 0.08           |
| IL-5        | 7.12 ± 1.97          | 5.71 ± 3.26          | 2.18 ± 1.78            | 1.11 ± 0.66           | 5.50 ± 4.41          | 9.23 ± 10.44          |
| IL-6        | 3.35 ±<br>1.51*      | 2.45 ±<br>1.31*      | 537.66 ±<br>417.18     | 397.54 ±<br>341.43    | 256.59 ±<br>183.1    | 448.16 ±<br>294.52    |
| IL-7        | 14.18 ± 8.61         | 11.51 ± 11.06        | 11.01 ± 5.26           | 11.19 ± 8.17          | 41.51 ± 99.92        | 63.39 ± 146.65        |
| IL-9        | 14.87 ± 10.69        | 8.02 ± 6.78          | 10.30 ± 8.93           | 8.69 ± 9.43           | 11.28 ± 7.68         | 12.25 ± 8.35          |
| IL-10       | 12.22 ± 5.83         | 2.38 ± 1.13          | 11.14 ± 12.03          | 14.15 ± 18.01         | 15.13 ± 11.16        | 11.37 ± 8.75          |
| IL12 (p40)  | 41.84 ± 32.05        | 22.48 ± 13.42        | 24.13 ± 19.98          | 27.61 ± 27.95         | 31.22 ± 24.43        | 17.07 ± 20.10         |
| IL-12 (p70) | 27.70 ± 19.35        | 10.83 ± 6.12         | 17.42 ± 15.14          | 12.62 ± 7.71          | 10.16 ± 6.16         | 9.34 ± 2.66           |
| IL-13       | 33.94 ± 8.04         | 29.87 ± 12.81        | 34.04 ± 9.17           | 31.63 ± 8.22          | 34.19 ± 8.29         | 31.96 ± 8.08          |
| IL-15       | 103.31 ± 50.35       | 131.33 ± 70.97       | 84.16 ± 54.06          | 97.32 ± 39.18         | 51.57 ± 19.99        | 517.81 ±<br>1308.98   |
| IL-17       | 3.04 ± 2.26          | 5.01 ± 1.18*         | 1.30 ± 0.57            | 1.75 ± 1.28           | 1.82 ± 0.85          | 2.11 ± 1.21           |
| IP-10       | 162.64 ±<br>43.04    | 145.68 ±<br>48.83*   | 238.29 ±<br>124.78     | 154.76 ±<br>17.98*    | 215.35 ±<br>52.46    | 227.77 ±<br>45.23     |
| KC          | 65.92 ± 2<br>6.47    | 90.02 ±<br>17.69     | 326.10 ±<br>215.79     | 288.89 ±<br>154.46    | 363.38 ±<br>200.65   | 1094.01 ±<br>528.53*  |
| LIF         | 2.03 ± 2.17*         | 2.50 ± 2.34          | 24.51 ± 11.26          | 45.26 ± 21.57*        | 15.79 ± 5.15         | 28.08 ± 21.16         |
| LIX         | 3254.87 ±<br>3474.12 | 1316.67 ±<br>1662.66 | 4211.17 ±<br>3120.65   | 5234.39 ±<br>4771.34  | 2515.38 ±<br>3119.67 | 1663.11 ±<br>1732.77  |
| MCP-1       | 56.10 ± 28.48        | 54.54 ± 7.47         | 116.59 ± 58.35         | 88.07 ± 24.41         | 91.18 ± 40.23        | 88.57 ± 18.09         |
| M-CSF       | 47.72 ± 27.44*       | 27.23 ± 10.09        | 23.63 ± 8.29           | 22.23 ± 9.45          | 20.21 ± 4.63         | 21.00 ± 4.19          |

|              |                |                |                |                |                |                |
|--------------|----------------|----------------|----------------|----------------|----------------|----------------|
| MIG          | 100.03 ± 20.20 | 89.29 ± 41.83  | 42.36 ± 14.76  | 39.33 ± 12.88  | 55.17 ± 10.58  | 90.75 ± 78.56  |
| MIP-1a       | 108.48 ± 32.73 | 75.46 ± 29.41  | 119.93 ± 59.04 | 108.03 ± 27.91 | 63.79 ± 19.14  | 67.82 ± 37.92  |
| MIP-1b       | 88.59 ± 10.35  | 87.69 ± 10.61  | 89.87 ± 24.41  | 81.67 ± 11.63  | 76.41 ± 12.81  | 83.90 ± 9.08   |
| MIP-2        | 117.91 ± 32.13 | 136.75 ± 47.91 | 139.23 ± 33.21 | 147.63 ± 59.81 | 146.34 ± 32.60 | 105.45 ± 37.15 |
| RANTES       | 29.72 ± 8.43   | 20.84 ± 10.38  | 23.70 ± 9.51   | 20.67 ± 4.57   | 19.70 ± 4.31   | 17.64 ± 6.13   |
| TNF $\alpha$ | 12.58 ± 4.75   | 12.15 ± 4.24   | 17.86 ± 19.40  | 12.71 ± 5.12   | 12.77 ± 4.55   | 11.01 ± 2.09   |
| VEGF         | 1.05 ± 0.39    | 0.87 ± 0.32    | 1.06 ± 0.27    | 0.87 ± 0.29    | 1.04 ± 0.24    | 0.88 ± 0.22    |

<sup>a</sup> pg/ml; Data expressed as mean ± SD

<sup>b</sup> Treatments (p.o., qd): GTx-024 (15 mg/kg); AR-42 (10 mg/kg), n=6 for tumor free groups and n=7-10 for tumor bearing groups.

\*p<0.05, versus tumor-bearing vehicle-treated controls; One-way ANOVA followed by Dunnett's multiple comparison test.

Eotaxin: chemokine (C-C motif) ligand 11; G-CSF: granulocyte colony-stimulating factor; GM-CSF: granulocyte macrophage colony-stimulating factor; IFN $\gamma$ : interferon gamma; IL-1a: interleukin-1 alpha; IL-1b: interleukin-1 beta; IL-2: interleukin-2; IL-3: interleukin-3; IL-4: interleukin-4; IL-5: interleukin-5; IL-6: interleukin-6; IL-7: interleukin-7; IL-9: interleukin-9; IL-10: interleukin-10; IL-12 (p40): interleukin-12 subunit p40; IL-12 (p70): interleukin-12 subunit p70; IL-13: interleukin-13; IL-15: interleukin-15; IL-17: interleukin-17; IP-10: interferon gamma-induced protein 10; KC: chemokine (C-X-C motif) ligand 1; LIF: leukemia inhibitory factor; LIX: chemokine (C-X-C motif) ligand 5; MCP: monocyte chemoattractant protein-1; M-CSF: macrophage colony-stimulating factor; MIG: monokine induced by gamma interferon, chemokine (C-X-C motif) ligand 9; MIP-1a: macrophage inflammatory protein-1 alpha; MIP-1b: macrophage inflammatory protein-1 beta; MIP-2: macrophage inflammatory protein-2; RANTES: regulated upon activation, normally T-expressed, and presumably secreted, chemokine (C-C motif) ligand 5; TNF $\alpha$ : tumor necrosis factor-alpha; VEGF: vascular endothelial growth factor.

**Appendix Table S14. Primer sequences.**

| Target              | Accession Number | Primer                |                       | Amplicon size (bp) | Sequence                | Reference                    |
|---------------------|------------------|-----------------------|-----------------------|--------------------|-------------------------|------------------------------|
|                     |                  | Forward (5' to 3')    | Reverse (5' to 3')    |                    |                         |                              |
| AR                  | NM_013476.4      | GCCTCCGAAGTGTGGTATCC  | CCTGGTACTGTCCAAACGCA  | 138                | 2457/2476,<br>2594/2575 |                              |
| C/EBP $\delta$      | NM_007679.4      | CGACTTCAGCGCCTACATTGA | CTAGCGACAGACCCACAC    | 171                | 216/236,<br>386/368     | Primer Bank ID<br>31560718a1 |
| Fbxo32/<br>Atrogin1 | NM_026346.3      | TTCAGCAGCCTGAACTACGA  | AGTATCCATGGCGCTCCTTC  | 139                | 435/454,<br>573/554     |                              |
| Trim63/<br>MuRF-1   | NM_001039048.2   | GTGACCAAGGAGAATAGCCAC | ATCAGAGCCTCGATGAAGCC  | 149                | 693/713,<br>841/822     |                              |
| B-actin             | NM_001101.3      | CATGTACGTTGCTATCCAGGC | CTCCTTAATGTCACGCACGAT | 250                | 477-497/706-<br>726     | Primer Bank ID<br>4501885a1  |

**Appendix Table S15. Post-alignment quality control metrics for RNA-seq dataset.** Adaptor sequences were trimmed from reads with Trimmomatic prior to alignment to mm10, and post-alignment metrics were calculated with samtools. Bed files used to calculate proportions of genic and exonic reads were obtained from the known Gene table associated with the UCSC Genes track (mm10).

| <b>Metric</b>                | <b>Mean</b> | <b>SD</b> | <b>Min</b> | <b>Max</b> |
|------------------------------|-------------|-----------|------------|------------|
| Total Reads (R1+R2)          | 44,883,616  | 8,088,060 | 34,227,544 | 67,059,036 |
| Reads After Adaptor Trimming | 43,026,750  | 7,833,050 | 33,101,092 | 65,368,280 |
| Duplicate Reads (%)          | 29.8%       | 4.3%      | 23.1%      | 40.5%      |
| Mapped Reads (%)             | 89.0%       | 1.3%      | 86.5%      | 91.5%      |
| Genic Reads (%)              | 84.0%       | 1.4%      | 81.2%      | 86.6%      |
| Exonic Reads (%)             | 82.0%       | 1.5%      | 79.2%      | 84.9%      |

## Appendix References

- Bolger AM, Lohse M, Usadel B (2014) Trimmomatic: a flexible trimmer for Illumina sequence data. *Bioinformatics* 30: 2114-2120
- Bonetto A, Aydogdu T, Kunzevitzky N, Guttridge DC, Khuri S, Koniaris LG, Zimmers TA (2011) STAT3 activation in skeletal muscle links muscle wasting and the acute phase response in cancer cachexia. *PLoS one* 6: e22538
- Cheng H, Xie Z, Jones WP, Wei XT, Liu Z, Wang D, Kulp SK, Wang J, Coss CC, Chen CS et al (2016) Preclinical Pharmacokinetics Study of R- and S-Enantiomers of the Histone Deacetylase Inhibitor, AR-42 (NSC 731438), in Rodents. *The AAPS journal* 18: 737-745
- Coss CC, Jones A, Dalton JT (2016) Pharmacokinetic drug interactions of the selective androgen receptor modulator GTx-024(Enobosarm) with itraconazole, rifampin, probenecid, celecoxib and rosuvastatin. *Investigational new drugs* 34: 458-467
- Kim J, Wu D, Hwang DJ, Miller DD, Dalton JT (2005) The para substituent of S-3-(phenoxy)-2-hydroxy-2-methyl-N-(4-nitro-3-trifluoromethyl-phenyl)-propionamides is a major structural determinant of in vivo disposition and activity of selective androgen receptor modulators. *The Journal of pharmacology and experimental therapeutics* 315: 230-239
- Kolde R (2015) pheatmap: Pretty Heatmaps.
- Lawrence M, Huber W, Pages H, Aboyoun P, Carlson M, Gentleman R, Morgan MT, Carey VJ (2013) Software for computing and annotating genomic ranges. *PLoS computational biology* 9: e1003118
- Li H, Handsaker B, Wysoker A, Fennell T, Ruan J, Homer N, Marth G, Abecasis G, Durbin R, Genome Project Data Processing S (2009) The Sequence Alignment/Map format and SAMtools. *Bioinformatics* 25: 2078-2079
- Liao Y, Smyth GK, Shi W (2013) The Subread aligner: fast, accurate and scalable read mapping by seed-and-vote. *Nucleic acids research* 41: e108
- Love MI, Huber W, Anders S (2014) Moderated estimation of fold change and dispersion for RNA-seq data with DESeq2. *Genome biology* 15: 550
- Narayanan R, Ahn S, Cheney MD, Yepuru M, Miller DD, Steiner MS, Dalton JT (2014) Selective androgen receptor modulators (SARMs) negatively regulate triple-negative breast cancer growth and epithelial:mesenchymal stem cell signaling. *PLoS one* 9: e103202
- Robinson MD, McCarthy DJ, Smyth GK (2010) edgeR: a Bioconductor package for differential expression analysis of digital gene expression data. *Bioinformatics* 26: 139-140
- Sborov DW, Canella A, Hade EM, Mo X, Khountham S, Wang J, Ni W, Poi M, Coss C, Liu Z et al (2017) A phase 1 trial of the HDAC inhibitor AR-42 in patients with multiple myeloma and T- and B-cell lymphomas. *Leukemia & lymphoma* 58: 2310-2318
- Schmidt A, Kimmel DB, Bai C, Scafonas A, Rutledge S, Vogel RL, McElwee-Witmer S, Chen F, Nantermet PV, Kasparcova V et al (2010) Discovery of the selective androgen receptor

modulator MK-0773 using a rational development strategy based on differential transcriptional requirements for androgenic anabolism versus reproductive physiology. *The Journal of biological chemistry* 285: 17054-17064

Subramanian A, Tamayo P, Mootha VK, Mukherjee S, Ebert BL, Gillette MA, Paulovich A, Pomeroy SL, Golub TR, Lander ES et al (2005) Gene set enrichment analysis: a knowledge-based approach for interpreting genome-wide expression profiles. *Proceedings of the National Academy of Sciences of the United States of America* 102: 15545-15550

Tseng YC, Kulp SK, Lai IL, Hsu EC, He WA, Frankhouser DE, Yan PS, Mo X, Bloomston M, Lesinski GB et al (2015) Preclinical Investigation of the Novel Histone Deacetylase Inhibitor AR-42 in the Treatment of Cancer-Induced Cachexia. *Journal of the National Cancer Institute* 107: djv274



**A**

| Dose (mg/kg) | Tissue | C <sub>max</sub> (nM) | AUC <sub>all</sub> (nM*h) | C <sub>avg</sub> (nM) |
|--------------|--------|-----------------------|---------------------------|-----------------------|
| 10           | Plasma | 1,501.6               | 10,931.6                  | 455.5                 |
| 10           | Muscle | 1,109.5               | 11,076.7                  | 461.5                 |
| 20           | Plasma | 3,858.9               | 34,369.3                  | 1,432.1               |
| 20           | Muscle | 3,662.4               | 36,504.2                  | 1,521.0               |
| 50           | Plasma | 7,925.1               | 74,307.3                  | 3,096.1               |
| 50           | Muscle | 6,367.0               | 72,624.7                  | 3,026.2               |

**B**

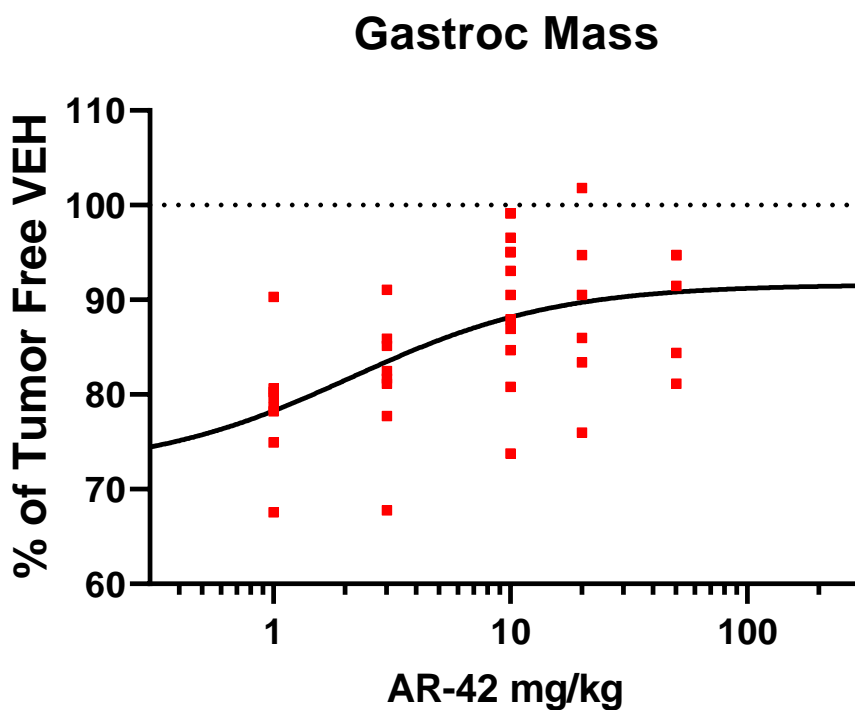

# Appendix Figure S2

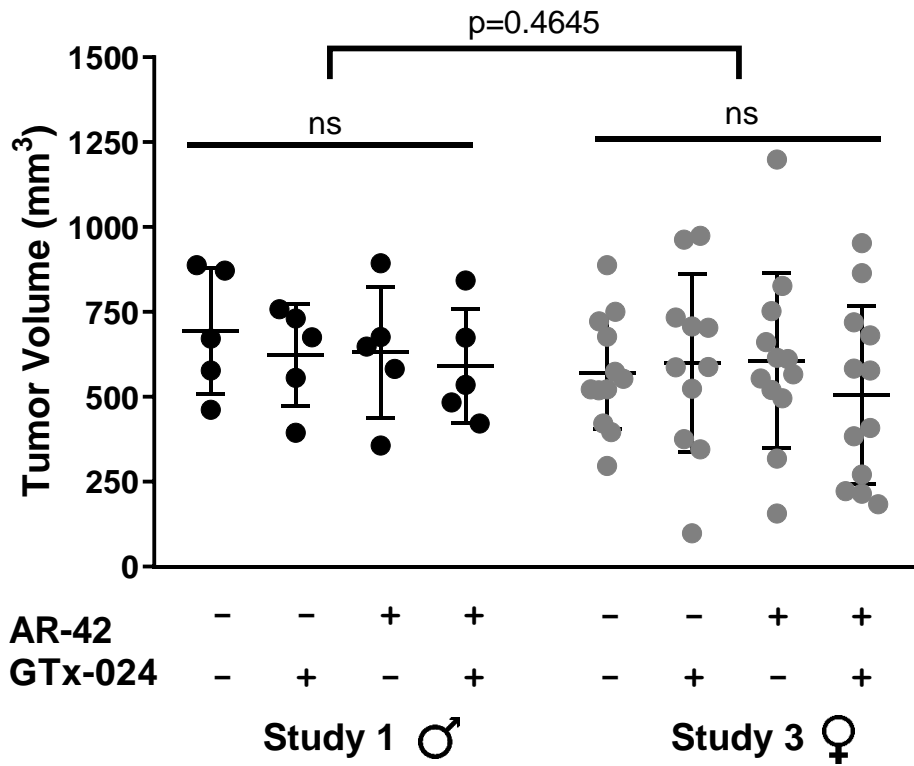

| p-values (Study 1) |             | Tumor Bearing |             |           |         |
|--------------------|-------------|---------------|-------------|-----------|---------|
|                    |             | Veh (V)       | GTx-024 (G) | AR-42 (A) | Combo   |
| Tumor Bearing      | Veh (V)     |               | 0.9969      | 0.9984    | 0.9783  |
|                    | GTx-024 (G) | 0.9969        |             | >0.9999   | >0.9999 |
|                    | AR-42 (A)   | 0.9984        | >0.9999     |           | 0.9999  |
|                    | Combo       | 0.9783        | >0.9999     | 0.9999    |         |

| p-values (Study 3) |             | Tumor Bearing |             |           |        |
|--------------------|-------------|---------------|-------------|-----------|--------|
|                    |             | Veh (V)       | GTx-024 (G) | AR-42 (A) | Combo  |
| Tumor Bearing      | Veh (V)     |               | 0.989       | 0.979     | 0.8926 |
|                    | GTx-024 (G) | 0.989         |             | 0.9999    | 0.7441 |
|                    | AR-42 (A)   | 0.979         | 0.9999      |           | 0.6882 |
|                    | Combo       | 0.8926        | 0.7441      | 0.6882    |        |

Appendix Figure S3

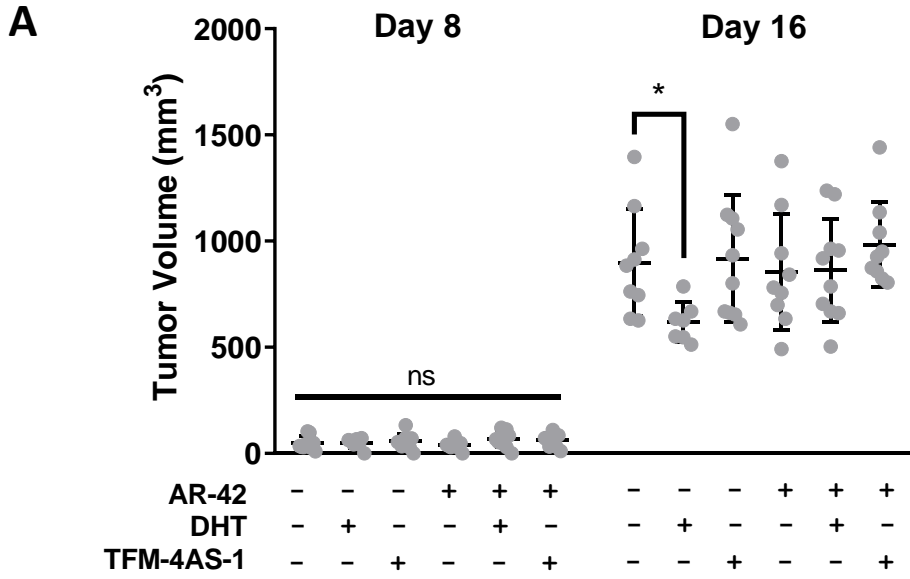

| p-values (Day 8) |                 | Tumor Bearing |        |
|------------------|-----------------|---------------|--------|
|                  |                 | Day 8         | Day 16 |
| Tumor Bearing    | Veh             |               |        |
|                  | DHT             | >0.9999       | 0.0086 |
|                  | TFM-4AS-1       | >0.9999       | 0.9998 |
|                  | AR-42           | >0.9999       | 0.9885 |
|                  | AR-42/DHT       | 0.9994        | 0.9942 |
|                  | AR-42/TFM-4AS-1 | 0.9999        | 0.8315 |

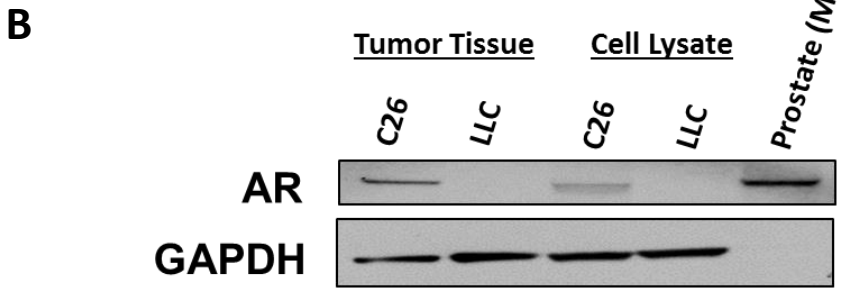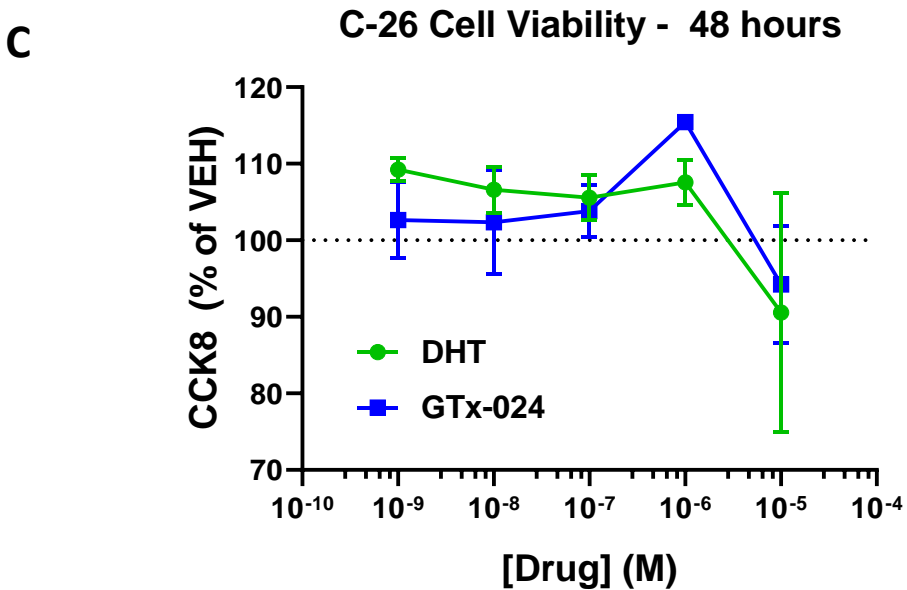

Appendix Figure S4

**Adipose Mass**

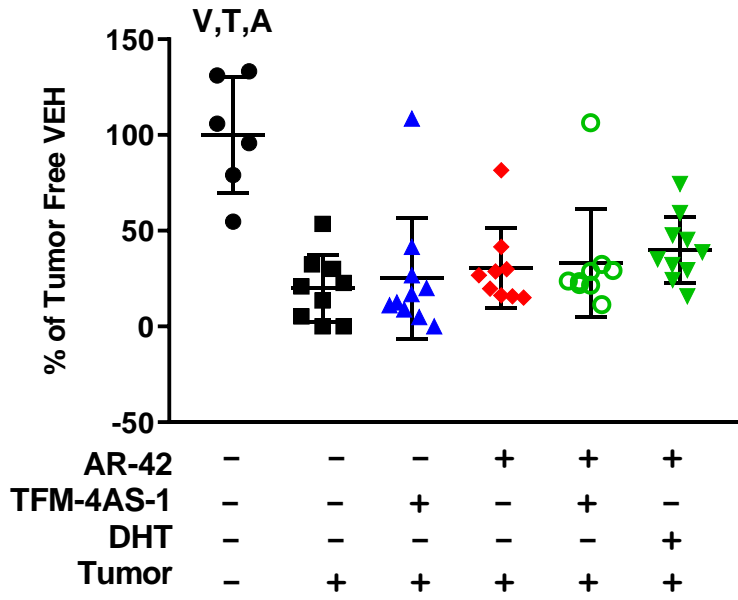

| p-values         |                 | Tumor Free | Tumor Bearing |           |         |               |                     |
|------------------|-----------------|------------|---------------|-----------|---------|---------------|---------------------|
|                  |                 | Veh        | Veh           | TFM-4AS-1 | AR-42   | AR-42/<br>DHT | AR-42/<br>TFM-4AS-1 |
| Tumor            | Veh             |            | <0.0001       | <0.0001   | <0.0001 | 0.0003        | <0.0001             |
| Tumor<br>Bearing | Veh             | <0.0001    |               | 0.9971    | 0.9382  | 0.4796        | 0.8578              |
|                  | TFM-4AS-1       | <0.0001    | 0.9971        |           | 0.9966  | 0.7481        | 0.9794              |
|                  | AR-42           | <0.0001    | 0.9382        | 0.9966    |         | 0.9573        | >0.9999             |
|                  | AR-42/DHT       | 0.0003     | 0.4796        | 0.7481    | 0.9573  |               | 0.9895              |
|                  | AR-42/TFM-4AS-1 | <0.0001    | 0.8578        | 0.9794    | >0.9999 | 0.9895        |                     |

Appendix Figure S5

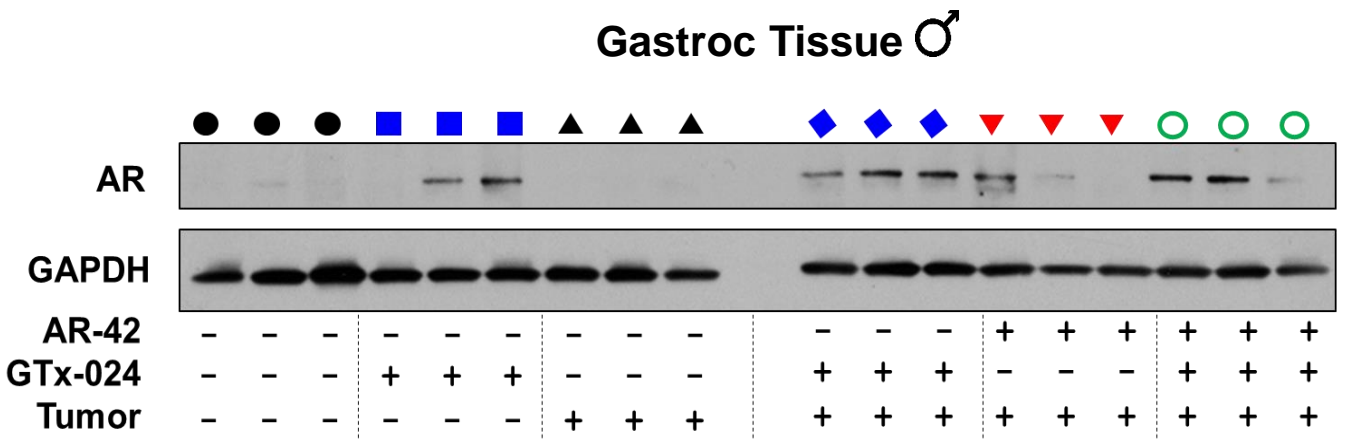

# Appendix Figure S6

**A**

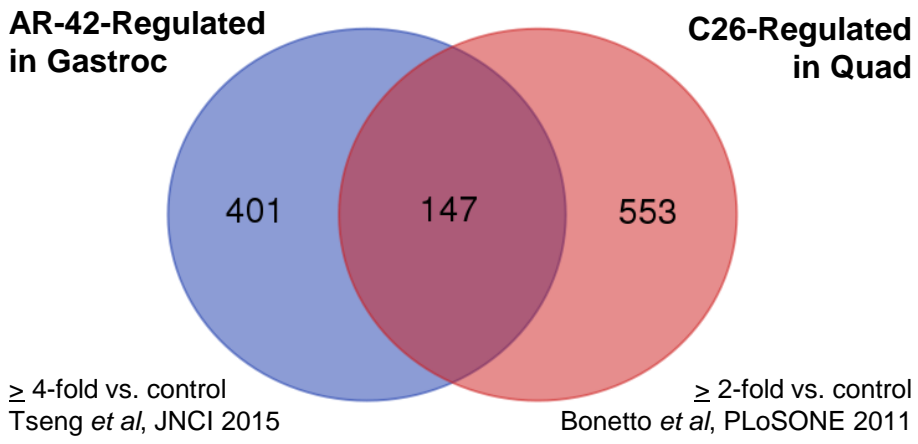

**B**

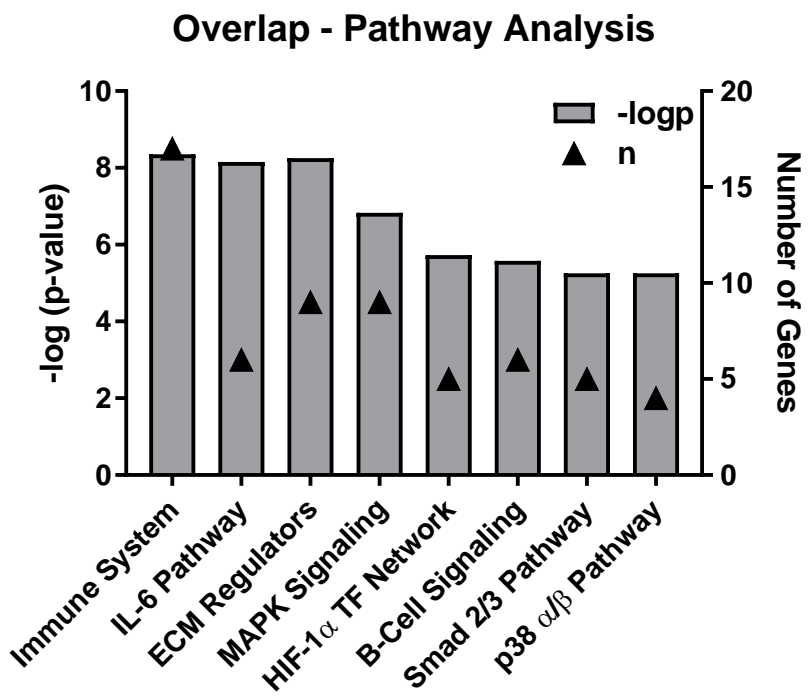



Appendix Figure S8

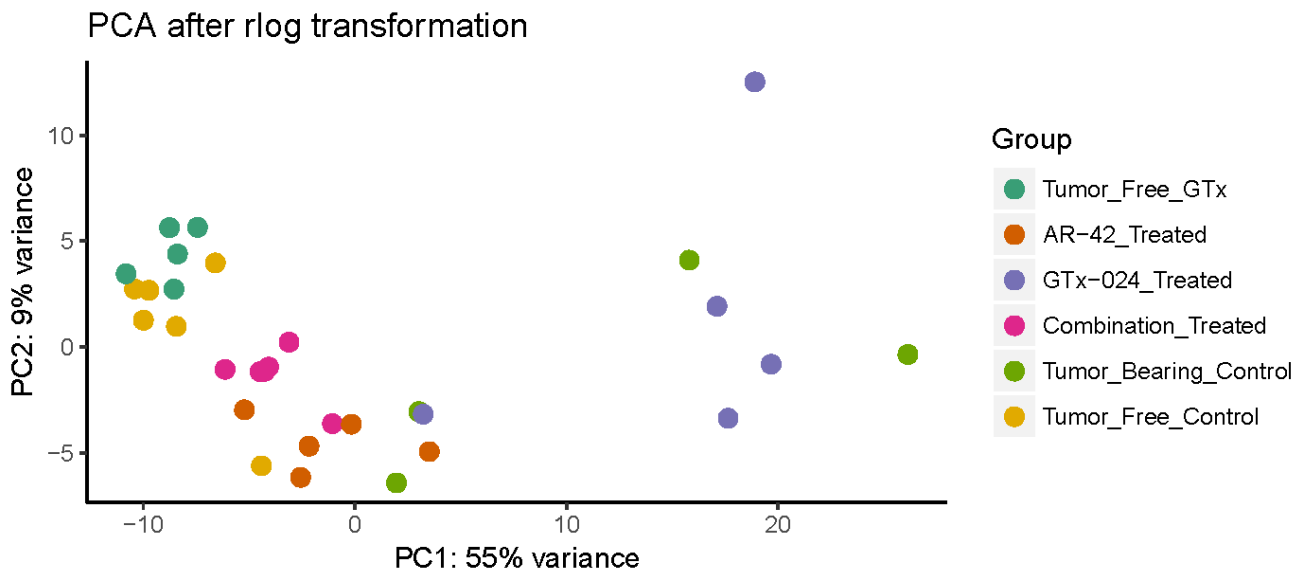



# Appendix Figure S9

## Cx+GTx-024 vs. Control

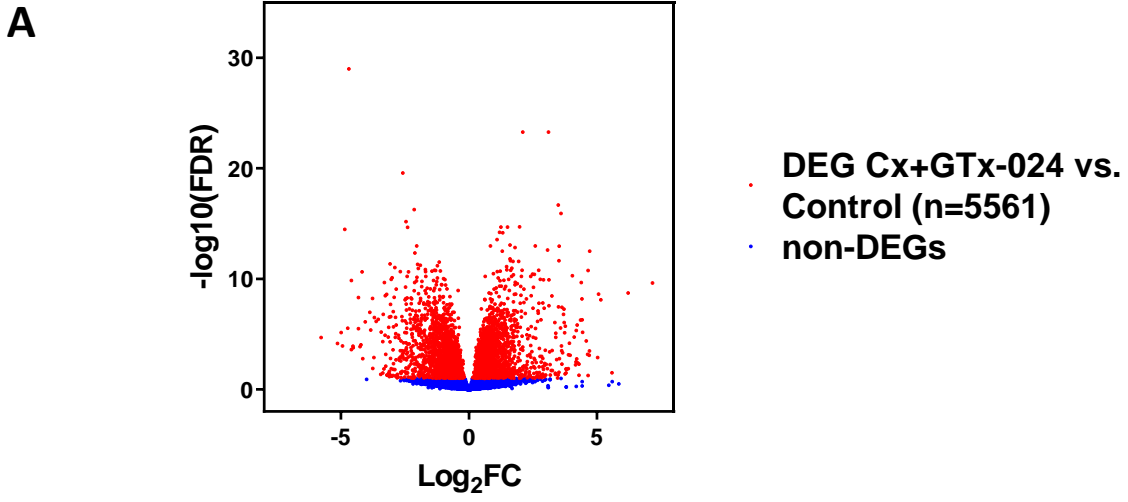

## Cx+AR-42 vs. Control

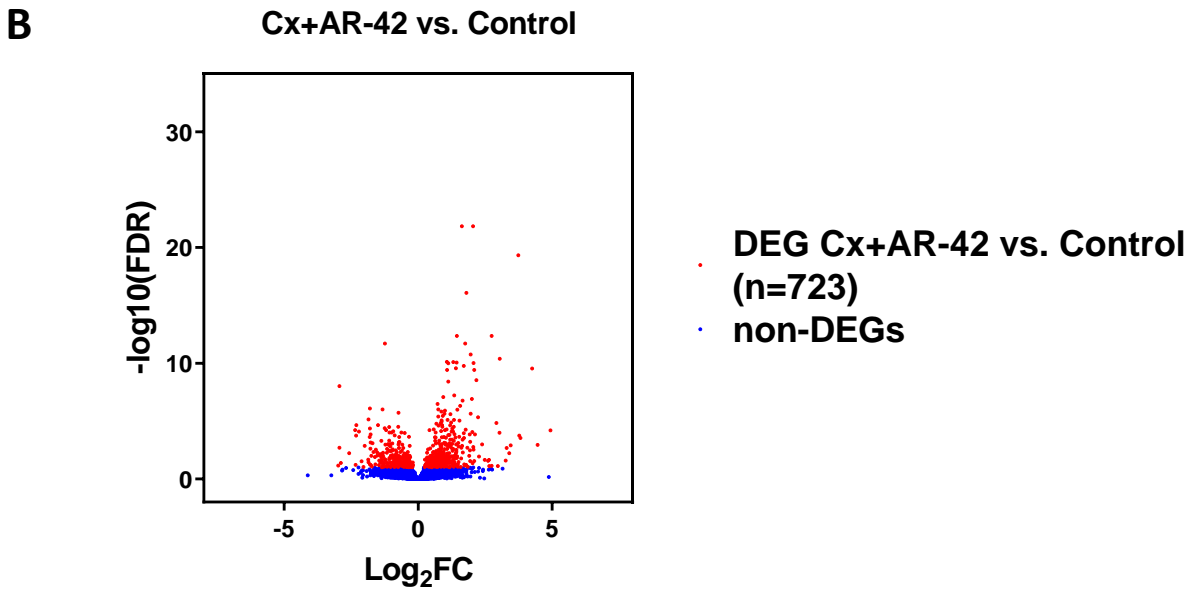

# Appendix Figure S10

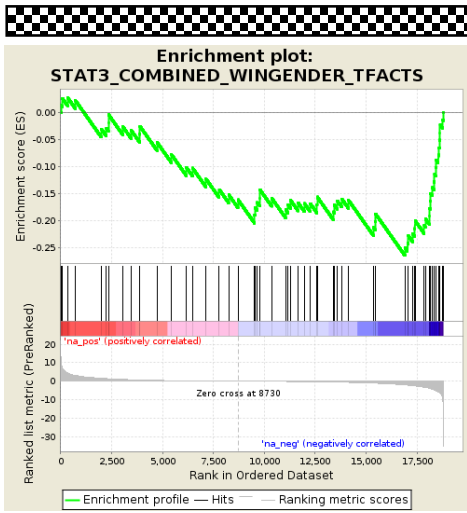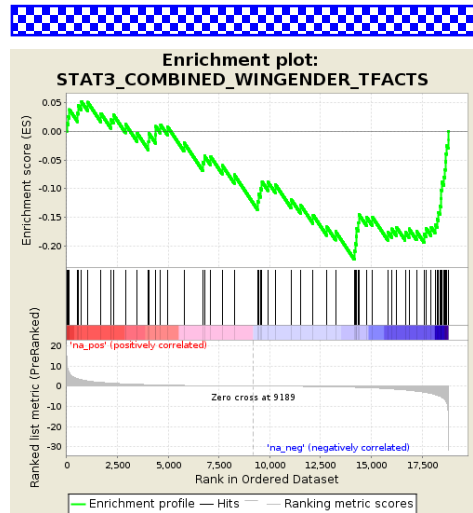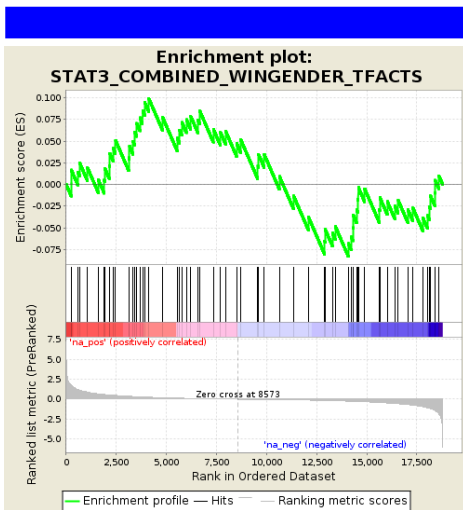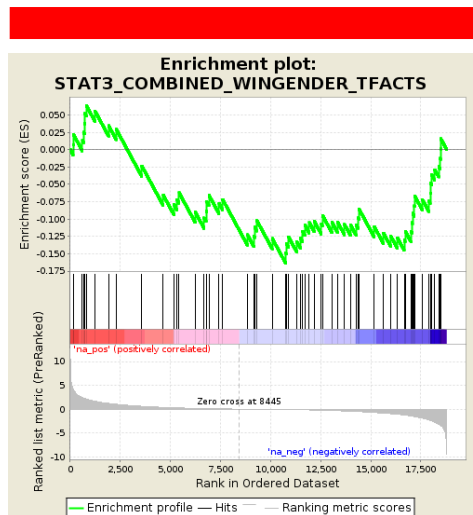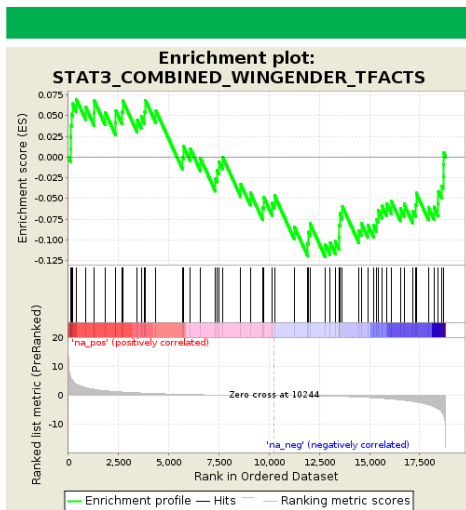

# Appendix Figure S11

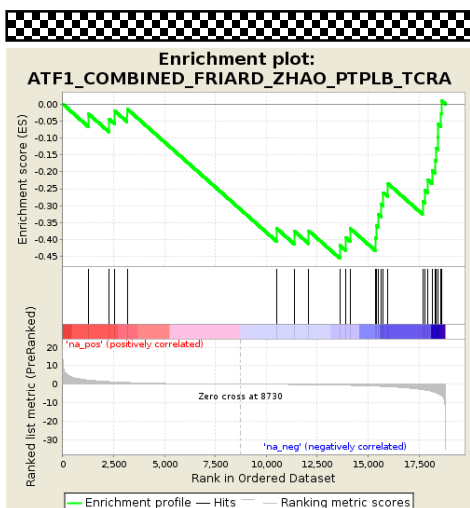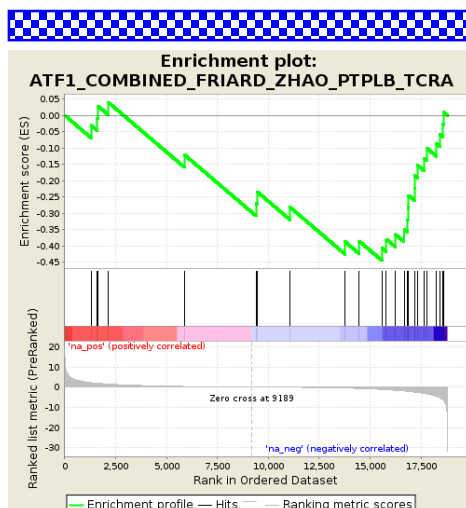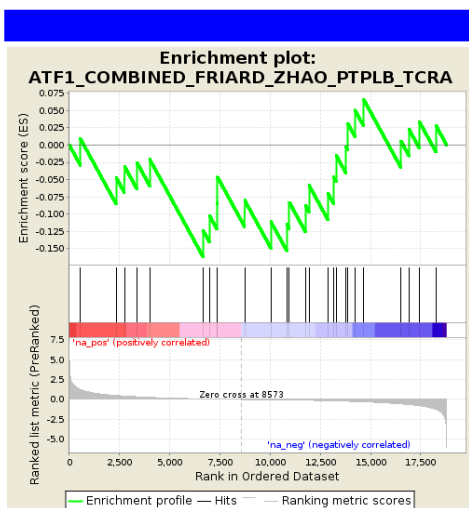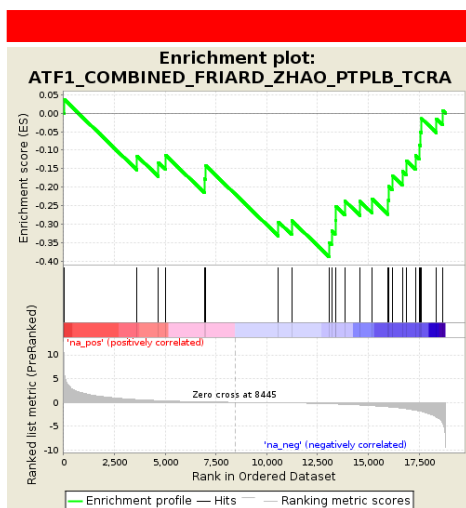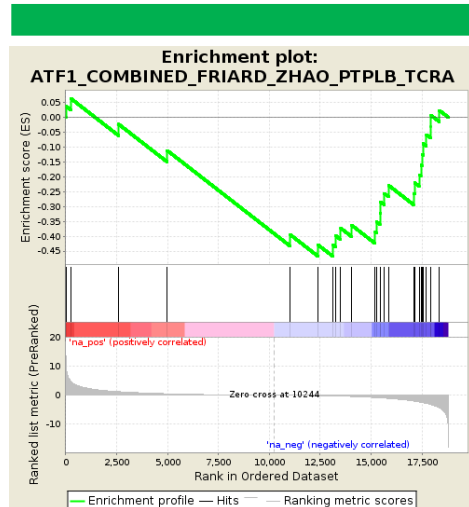

# Appendix Figure S12

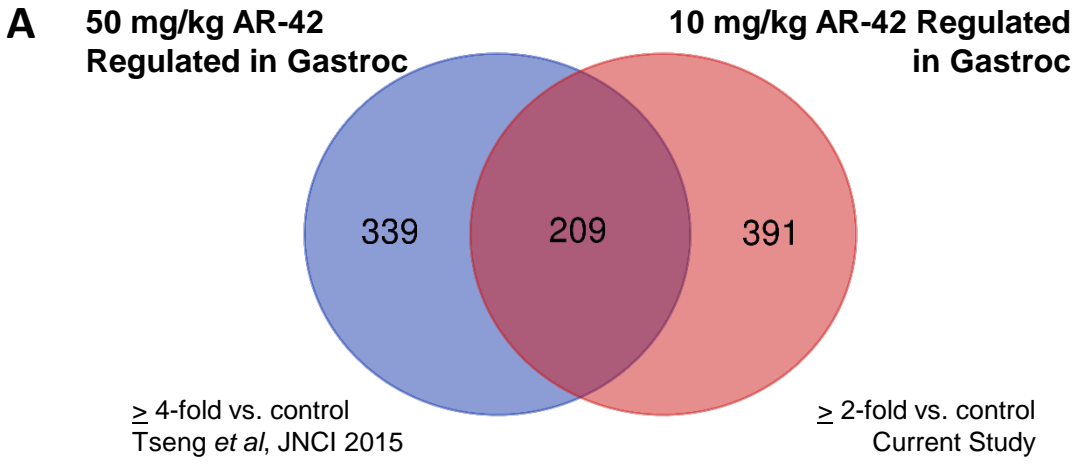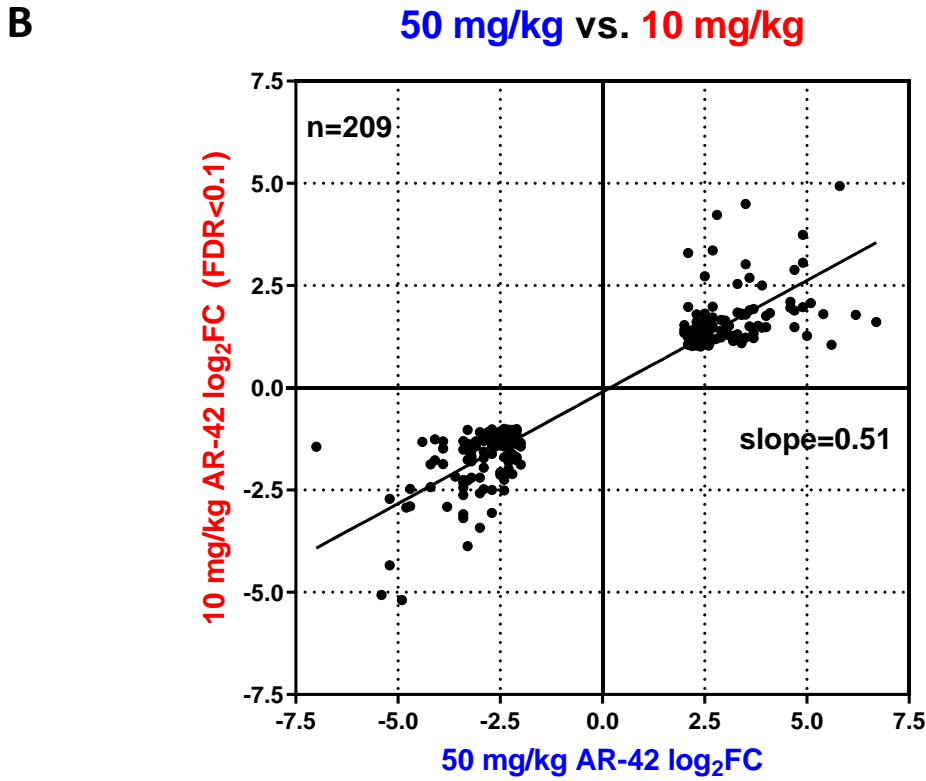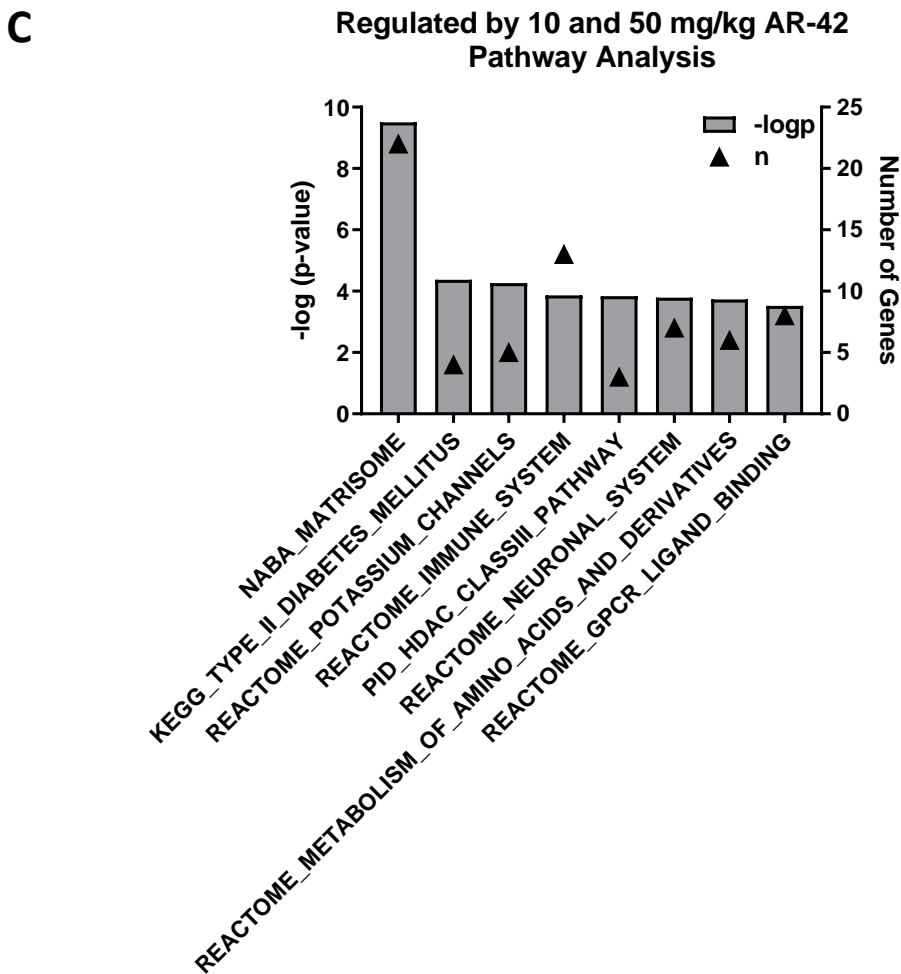

Appendix Figure S13

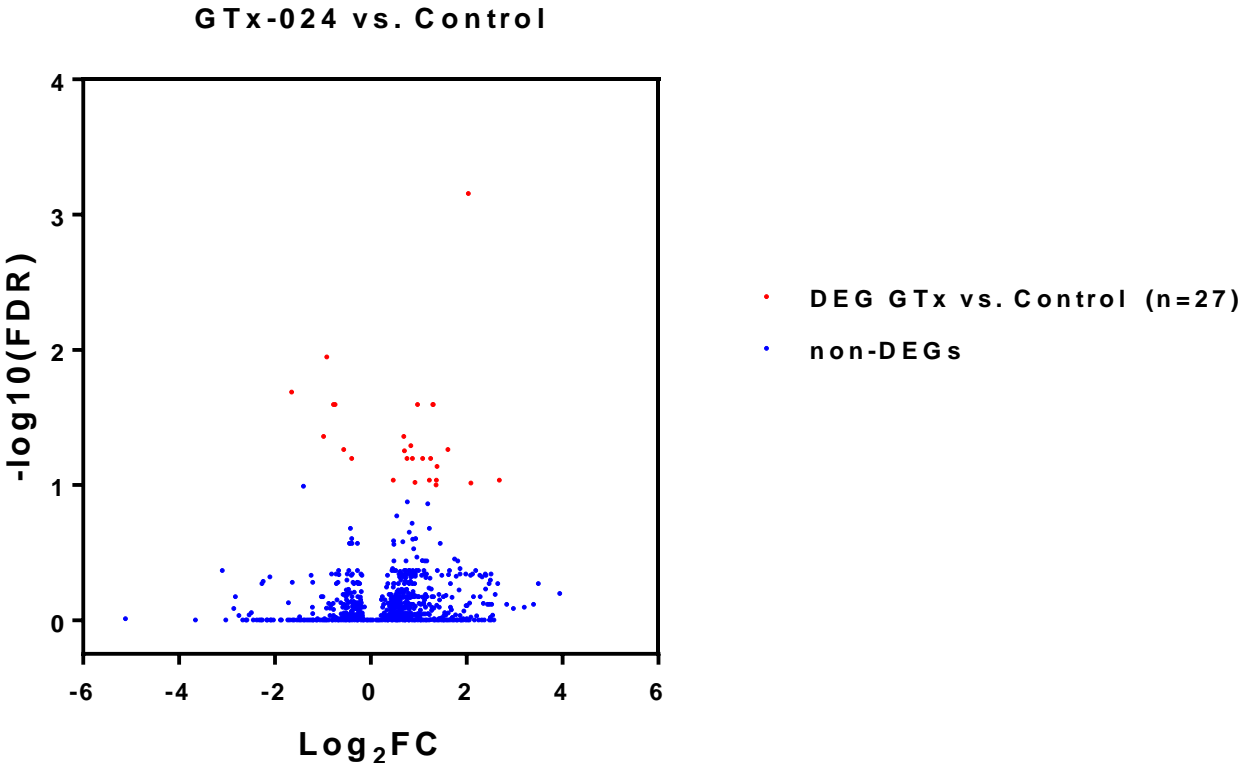

Appendix Figure S14

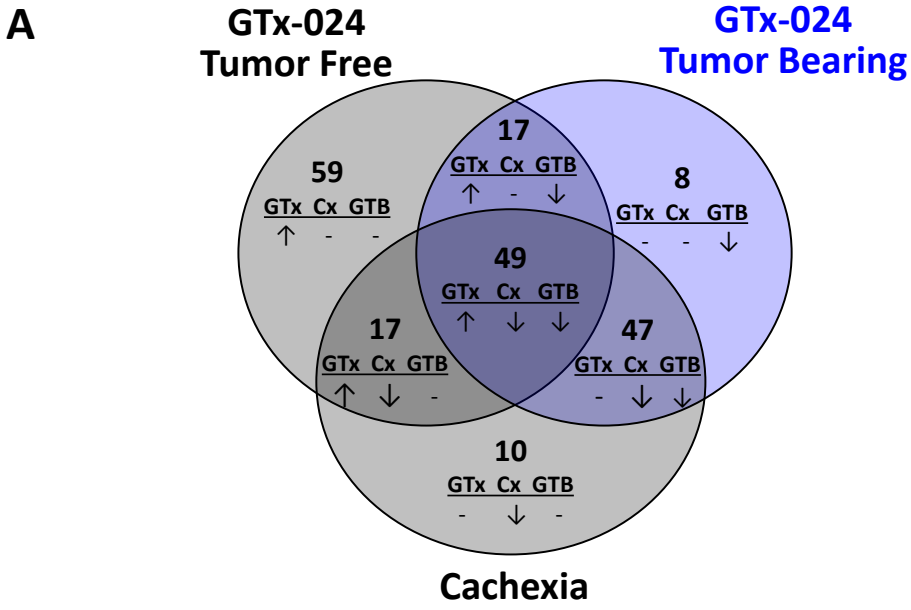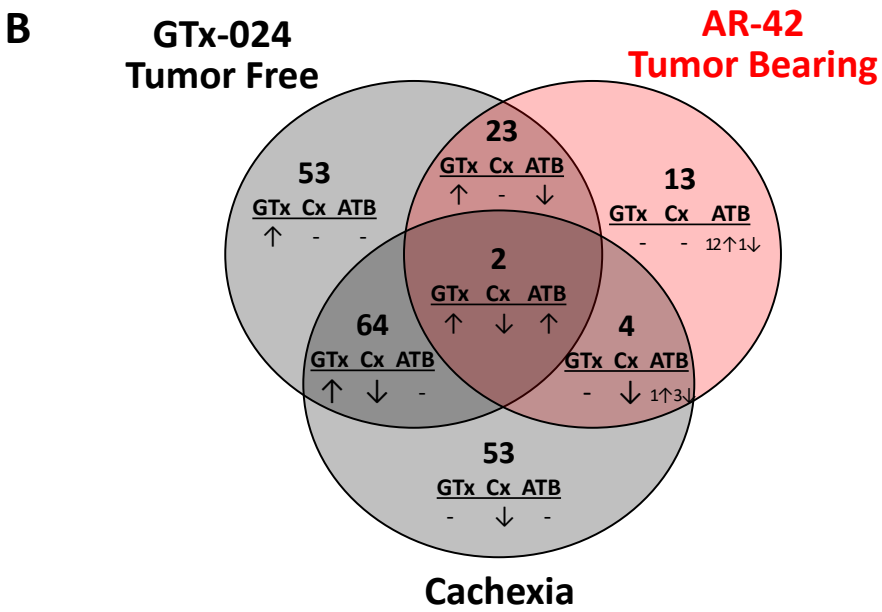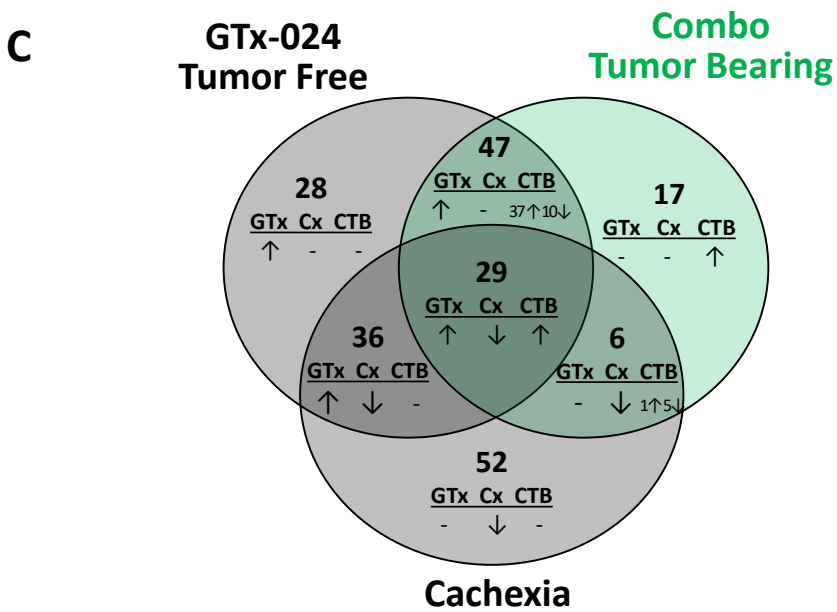

Appendix Figure S15

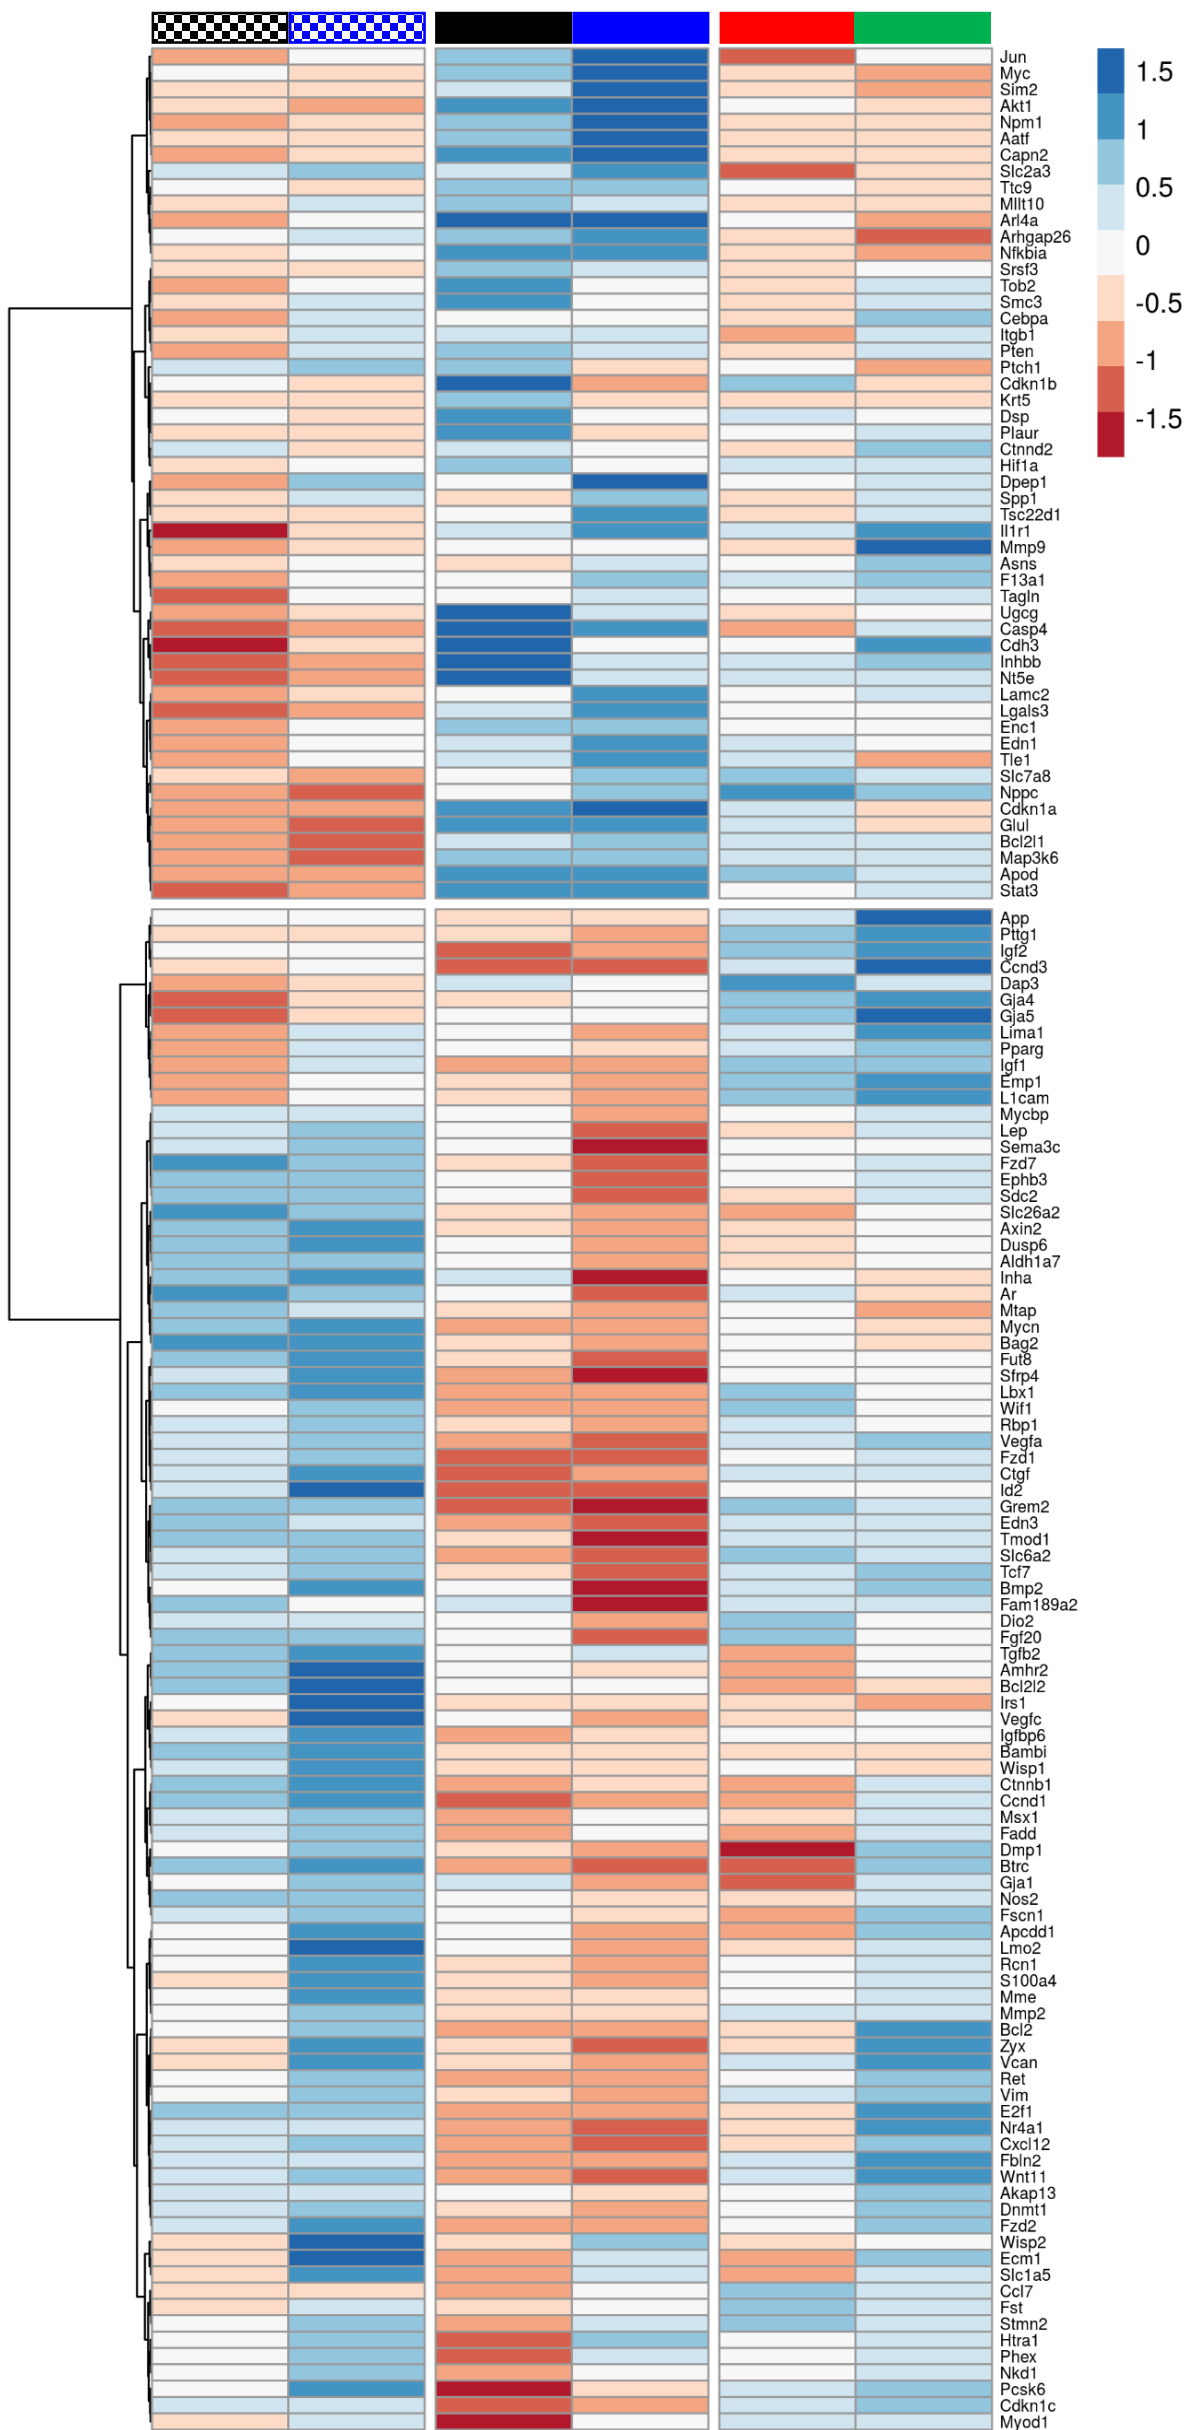

Supplement: EMMM-12-e9910-s001.pdf [file EMMM-12-e9910-s001.pdf]
