# Supplementary material for: Overcoming resistance to anabolic SARM therapy in experimental cancer cachexia with an HDAC inhibitor
Source: PubMed Central journal article supplement (PMC7005646; doi:10.15252/emmm.201809910), 2020-01-13
Supplement: EMMM-12-e9910-s002.pdf [file EMMM-12-e9910-s002.pdf]

## Expanded View Figures

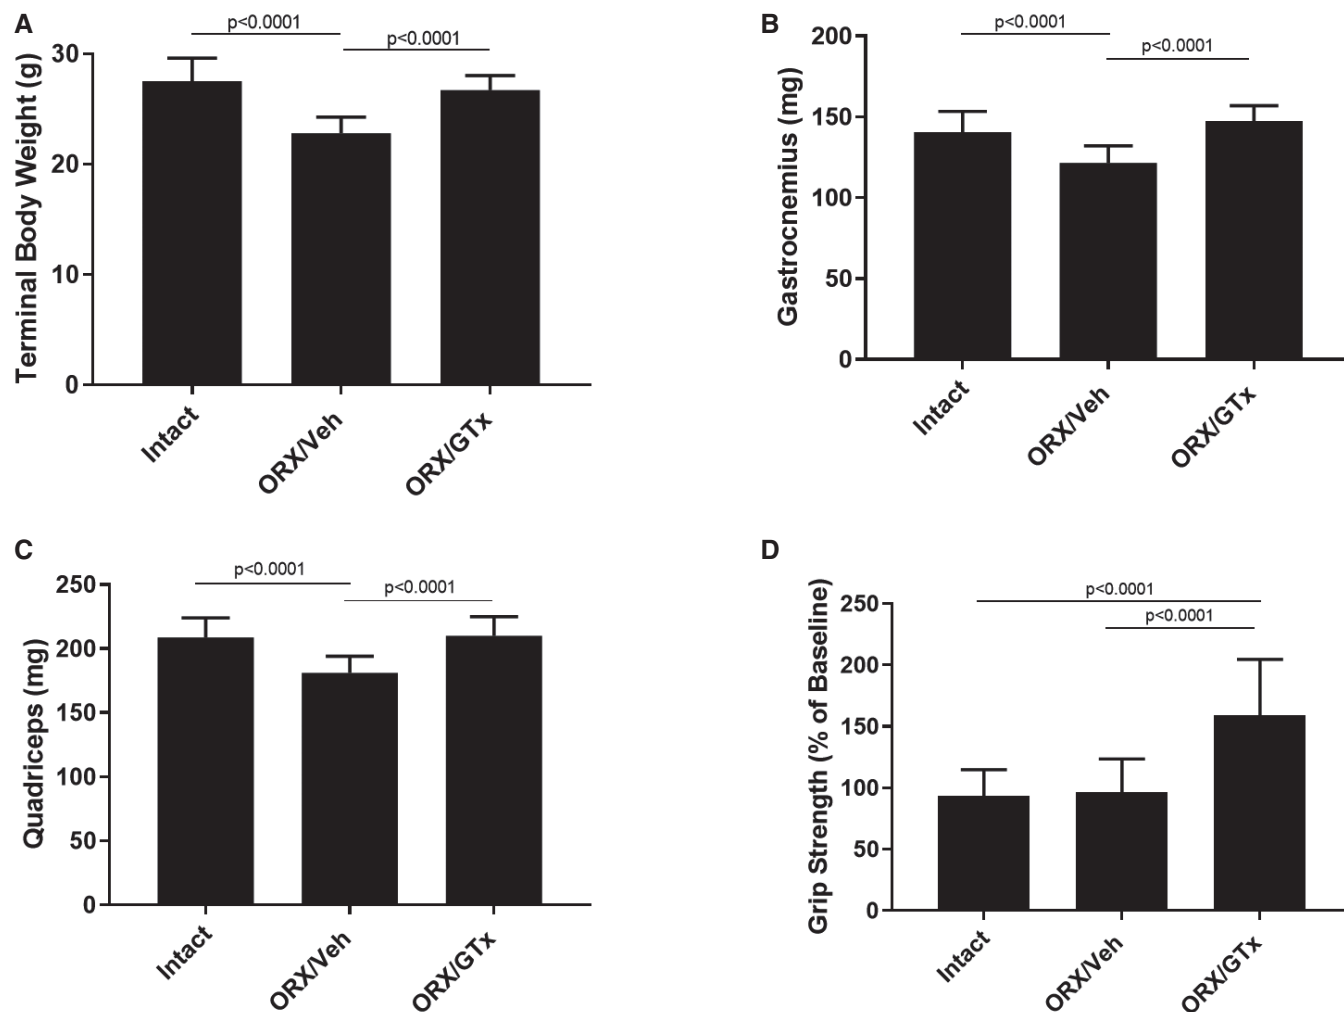

**Figure EV1. Confirmation of the anabolic activity of GTx-024.**

Orchiectomized (ORX) male CD2F1 mice were treated with GTx-024 (GTx; 15 mg/kg;  $n = 12$ ) or vehicle (Veh;  $n = 13$ ) once daily by oral gavage for 28 days. Sham-orchiectomized (intact) mice ( $n = 14$ ) were treated identically with vehicle.

A Terminal body weights.

B Terminal gastrocnemius weights.

C Terminal quadriceps weights.

D Forelimb grip strength expressed as % baseline defined as (end of study grip strength)  $\times$  100/(pre-treatment grip strength).

Data information: *P*-values are provided in Appendix Table S9. One-way ANOVA followed by Tukey's multiple comparisons procedure. Data are presented as means  $\pm$  SD.

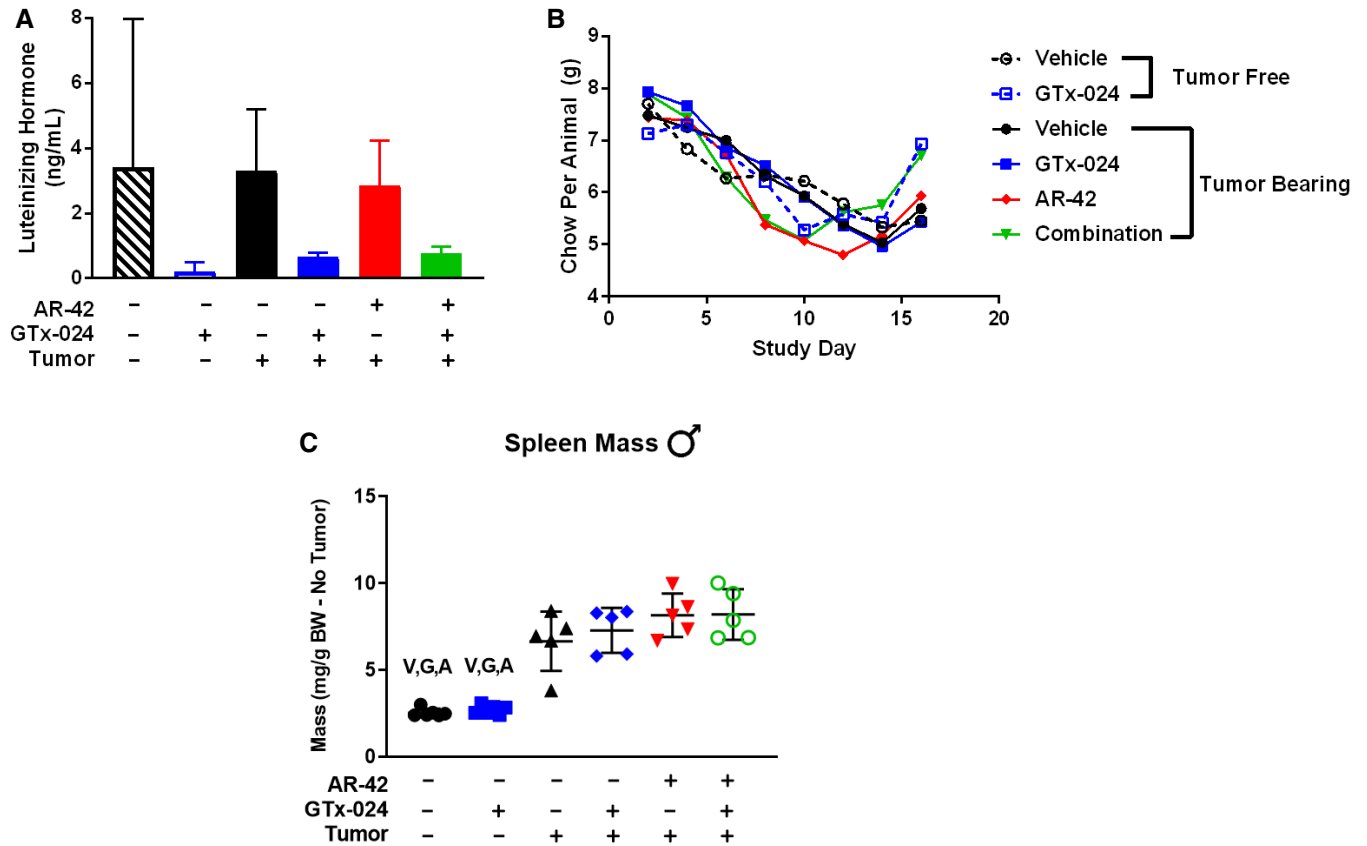

**Figure EV2. Anti-cachectic effects of combination therapy in male C-26 tumor-bearing mice.**

Study 1, tumor-bearing male mice receiving GTX-024 (15 mg/kg;  $n = 5$ ), AR-42 (10 mg/kg;  $n = 5$ ), combination (15 mg/kg GTX-024 and 10 mg/kg AR-42;  $n = 5$ ), or vehicle ( $n = 5$ ) and tumor-free mice receiving GTX-024 (15 mg/kg;  $n = 6$ ) or vehicle ( $n = 6$ ) were treated daily by oral gavage for 13 days starting 6 days post-injection of C-26 cells.

A Serum-luteinizing hormone levels measured on day 18.

B Per animal food consumption measured every 2 days.

C Spleen weights normalized to tumor mass-corrected terminal body weight.

Data information: V, G, A indicate statically significant differences versus tumor-bearing vehicle-treated, tumor-bearing GTX-024-treated, and tumor-bearing AR-42-treated groups, respectively.  $P$ -values are provided in Appendix Table S10, one-way ANOVA followed by Tukey's multiple comparison test. Means  $\pm$  SD, except for (B) in which error bars are not shown to improve clarity of presentation. BW, body weight.

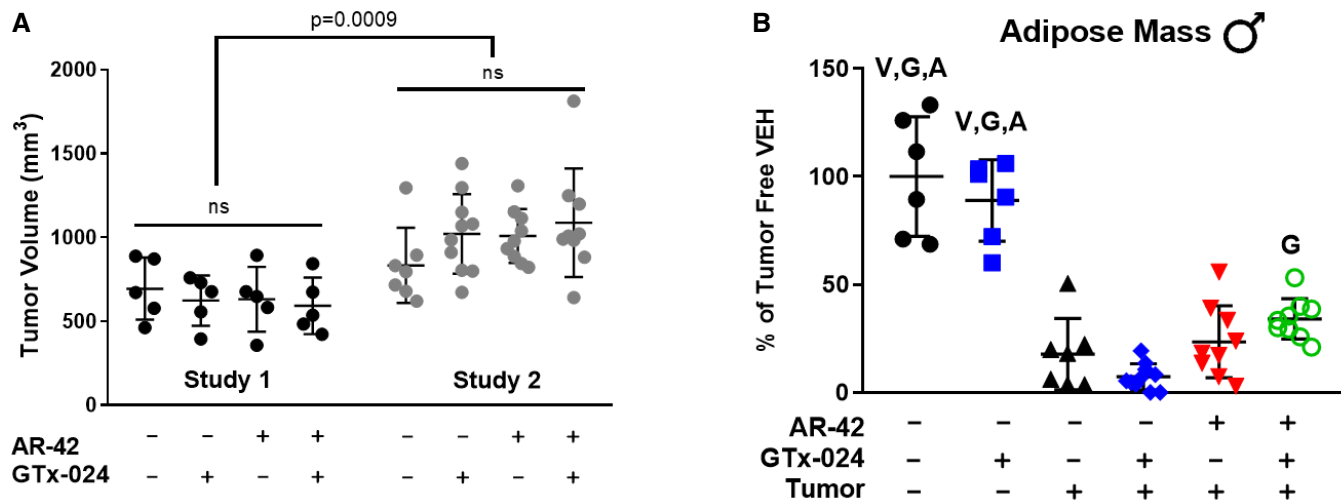

**Figure EV3. Terminal tumor volume and fat mass in Study 2.**

Study 2, tumor-bearing male mice receiving GTx-024 (15 mg/kg; *n* = 10), AR-42 (10 mg/kg; *n* = 9), combination (15 mg/kg GTx-024 and 10 mg/kg AR-42; *n* = 9) or vehicle (*n* = 7) and tumor-free male mice receiving GTx-024 (15 mg/kg; *n* = 6) or vehicle (*n* = 6) were treated daily by oral gavage for 12 days starting 6 days post-injection of C-26 cells.

**A** Terminal tumor volume comparisons between the initial (Study 1, day 18) and confirmatory (Study 2, day 17) combination studies. *Statistics:* *P* = 0.0009, Student's *t*-test of combined tumor volumes (Study 1 versus Study 2). ns, no significant differences among treatment groups within each study, one-way ANOVA followed by Tukey's multiple comparison test.

**B** Terminal epididymal fat pad mass.

Data information: V, G, A indicate statistically significant differences versus tumor-bearing vehicle-treated, tumor-bearing GTx-024-treated, and tumor-bearing AR-42-treated groups, respectively. *P*-values are provided in Appendix Table S11, one-way ANOVA followed by Tukey's multiple comparison test. Data are presented as means ± SD.

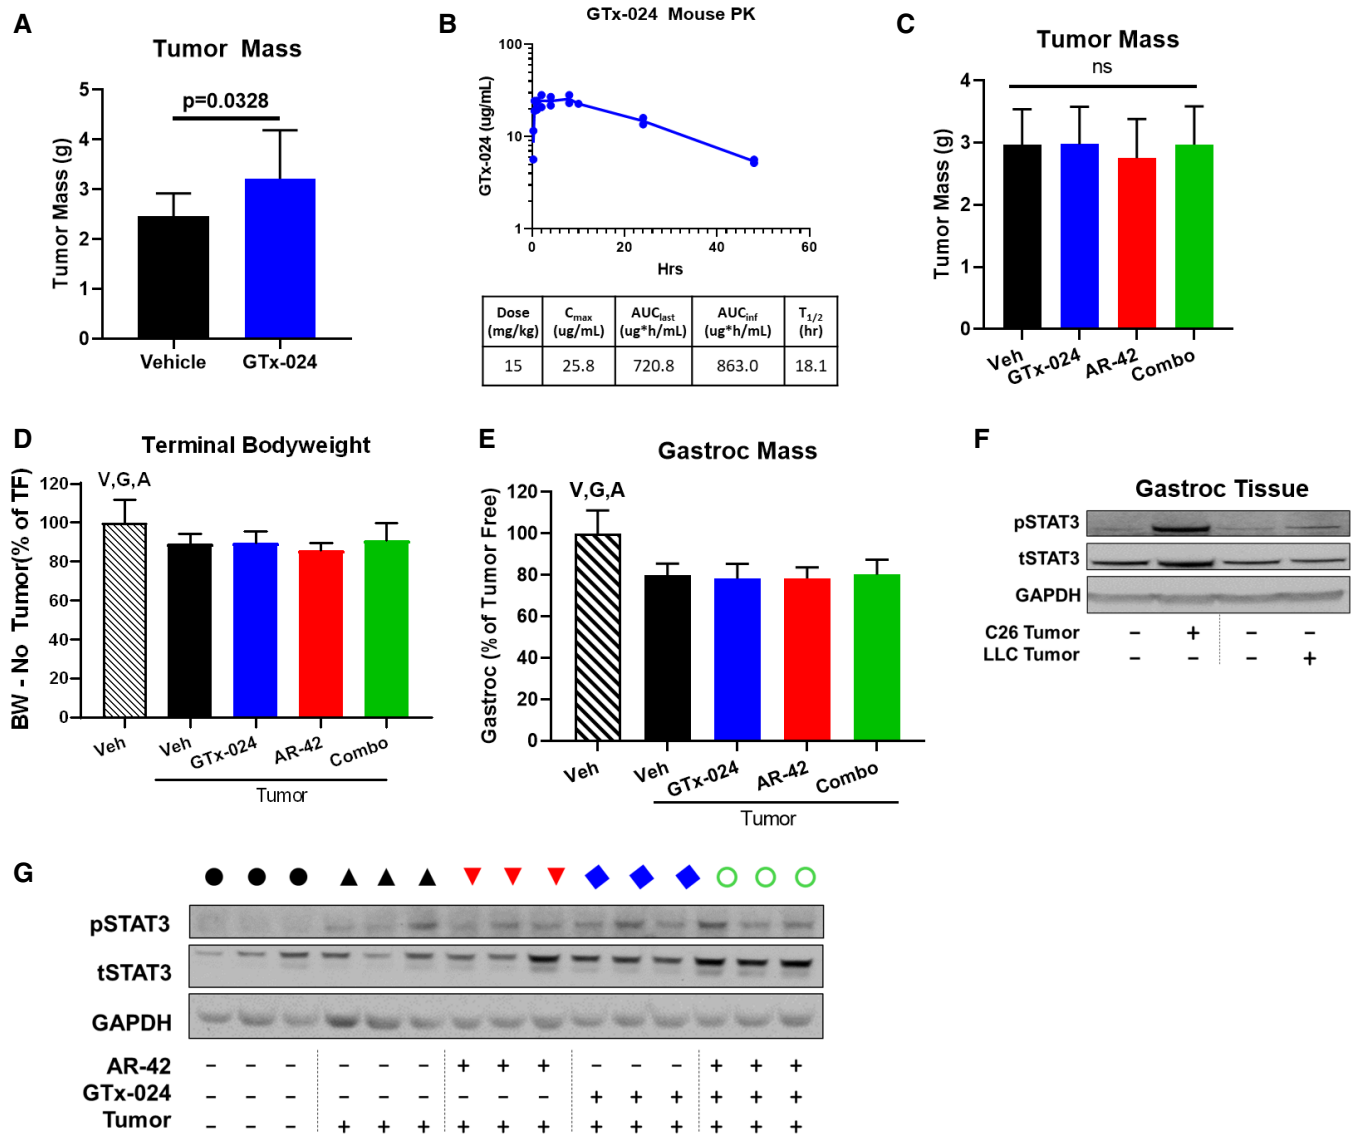

**Figure EV4. Anabolic resistance in the LLC model.**

Study 5, tumor-bearing male mice receiving GTX-024 (15 mg/kg;  $n = 12$ ), AR-42 (10 mg/kg;  $n = 12$ ), combination (15 mg/kg GTX-024 and 10 mg/kg AR-42;  $n = 12$ ), or vehicle ( $n = 12$ ) and tumor-free mice receiving vehicle ( $n = 6$ ) were treated daily by oral gavage for 14 days starting 6 days post-injection of LLC cells.

**A** LLC tumor-bearing mice receiving 15 mg/kg GTX-024 monotherapy exhibited larger terminal tumor mass than tumor-bearing vehicle-treated controls.

**B** Plasma pharmacokinetics of GTX-024 following a single 15 mg/kg oral dose.

**C–E** Repeat of Study 5 with lower dose of GTX-024. Tumor-bearing male mice receiving GTX-024 (0.5 mg/kg;  $n = 12$ ), AR-42 (10 mg/kg;  $n = 12$ ), combination (0.5 mg/kg GTX-024 and 10 mg/kg AR-42;  $n = 12$ ), or vehicle ( $n = 12$ ) and tumor-free mice receiving vehicle ( $n = 6$ ) were treated daily by oral gavage for 13 days starting 6 days post-injection of LLC cells. **(C)** Terminal tumor masses (mean  $\pm$  SD). ns, no significant differences among treatment groups, one-way ANOVA followed by Tukey's multiple comparison test. **(D)** Terminal body weights corrected for tumor mass compared to tumor-free controls (mean  $\pm$  SD). **(E)** Terminal gastrocnemius mass (mean  $\pm$  SD) compared to tumor-free controls.

**F** Western blot of pSTAT3 (Y705) and total (t)STAT3 in pooled gastrocnemius muscle from C-26 and LLC tumor-bearing animals and associated tumor-free controls.

**G** Western blot of pSTAT3/tSTAT3 levels in gastrocnemius tissue from representative individual animals from Study 5. Black circle—tumor-free, blue square—tumor-free/GTX-024, black triangle—tumor-bearing, blue diamond—tumor/GTX-024, red triangle—tumor/AR-42, green circle—tumor/combo.

Data information: **(A)**  $P = 0.0328$  versus tumor-bearing vehicle-treated controls. One-way ANOVA followed by Dunnett's multiple comparison test. **(C, D)** V, G, A indicate statistically significant differences for tumor-free versus tumor-bearing vehicle-treated ( $P = 0.0294$ ), tumor-bearing GTX-024-treated ( $P = 0.0327$ ), and tumor-bearing AR-42-treated groups ( $P = 0.0015$ ), respectively.  $P$ -values are provided in Appendix Table S12. One-way ANOVA followed by Tukey's multiple comparison test. **(E)** V, G, A indicate statistically significant differences for tumor-free versus tumor-bearing vehicle-treated ( $P < 0.0001$ ), tumor-bearing GTX-024-treated ( $P < 0.0001$ ), and tumor-bearing AR-42-treated ( $P < 0.0001$ ) groups, respectively.  $P$ -values are provided in Appendix Table S12. One-way ANOVA followed by Tukey's multiple comparison test. Source data are available online for this figure.
